# Supplementary material
Source: PubMed Central journal article supplement (PMC3486519)
Supplement: NIHMS408700-supplement-1_si_001.pdf [file NIHMS408700-supplement-1_si_001.pdf]

## Supporting Information

### Organic Radical Contrast Agents for Magnetic Resonance Imaging

Andrzej Rajca<sup>1</sup>, Ying Wang<sup>1</sup>, Michael Boska<sup>2</sup>, Joseph T. Paletta<sup>1</sup>, Arnon Olankitwanit<sup>1</sup>, Michael A. Swanson,<sup>3</sup> Deborah G. Mitchell,<sup>3</sup> Sandra S. Eaton<sup>3</sup>, Gareth R. Eaton<sup>3</sup>, Suchada Rajca<sup>1</sup>

<sup>1</sup>Department of Chemistry, University of Nebraska, Lincoln, NE 68588-0304.

<sup>2</sup>Department of Radiology, University of Nebraska Medical Center, Omaha, NE 68198.

<sup>3</sup>Department of Chemistry and Biochemistry, University of Denver, Denver, CO 80208-2436

### Table of Contents

**Section 1.** Materials, General Methods, and Instrumentation

**Section 2.** Synthetic Protocols

2.a Synthesis of nitroxide radicals **1-OH** and **1-NHS**

2.b EPR and <sup>1</sup>H NMR analyses of nitroxide radicals

2.c Synthesis of organic radical contrast agents (ORCA)

2.d NMR and IR spectroscopic analyses of ORCA after reduction with ascorbate

**Section 3.** *In Vitro* Characterization

3.a Kinetics of reduction of nitroxides with ascorbate

3.b Relaxivity ( $r_1$ ) and stability of ORCA

3.c Rotational correlation times ( $\tau_{rot}$ ), electron spin relaxation times ( $T_{1e}$  and  $T_{2e}$ ), and factors limiting  $r_1$

**Section 4.** *In Vivo* Characterization

**Section 5.** Supporting References

## Section 1. Materials, General Methods, and Instrumentation

*Note:* Throughout the Supplementary Information, labels “yw0380B3” and alike correspond to sample or experiment codes directly traceable to the laboratory notebooks or raw data.

All solvents were distilled, e.g., dimethylformamide (distilled under vacuum from calcium hydride), toluene (freshly distilled from sodium), and THF (freshly distilled from sodium benzophenone), or alternatively, obtained from solvent purification system (LC Technology Solutions). *N,N*-Diisopropylethylamine (Hünig's base) was dried over calcium hydride, and then distilled. Per-deuterated solvents for NMR spectroscopy were obtained from Cambridge Isotope Laboratories or Aldrich and used as received. Monodisperse mPEG-12-NHS was obtained from Quanta BioDesign. All other commercially available chemicals were obtained from either Aldrich or Fisher, unless indicated otherwise. Column chromatography (0–20 psig pressure) was carried out on flash silica gel (Sorbent Technologies). Analytical and preparative glass plates (tapered with a preadsorbent zone) for thin layer chromatography (TLC) were obtained from Analtech. Standard techniques for synthesis under inert atmosphere, using Schlenk glassware and gloveboxes (Vacuum Atmospheres), were employed for synthesis of ORCA.

CW X-band EPR spectra for spin quantitation of nitroxide radicals and kinetics of reduction were acquired on a Bruker EMX instrument at Nebraska, equipped with a frequency counter and nitrogen flow temperature control (120–300 K). The spectra were obtained using a Bruker TE<sub>102</sub> cavity. DPPH powder ( $g = 2.0037$ ) was used as a  $g$ -value reference. The spin concentration of low molecular weight nitroxide radicals and of nitroxide radicals in ORCA were measured in dichloromethane and PBS buffer at room temperature (295 K), respectively; 4-oxo-TEMPO and/or 3-carboxy-PROXYL in respective solvents were used as intensity references. For low molecular weight nitroxide radicals, typical parameters were: modulation amplitude, 0.2 G; sweep width, 100 G.

<sup>1</sup>H NMR spectra were obtained with Bruker spectrometers (<sup>1</sup>H, 600, 500, and 400 MHz) using chloroform-*d* (CDCl<sub>3</sub>), water-*d*<sub>2</sub> (D<sub>2</sub>O), dimethylsulfoxide-*d*<sub>6</sub> (DMSO-*d*<sub>6</sub>), and acetone-*d*<sub>6</sub> as solvents. (Spectra obtained in per-deuterated PBS buffer are labeled as obtained in D<sub>2</sub>O.) The chemical shifts were measured with respect to residual solvent peak of chloroform-*d* ( $\delta$  7.26 ppm), dimethylsulfoxide-*d*<sub>6</sub> ( $\delta$  2.50 ppm) and acetone-*d*<sub>6</sub> ( $\delta$  2.05 ppm); for spectra in D<sub>2</sub>O or deuterated PBS buffer, the chemical shifts were referenced with respect to 0.05 wt% of 3-(trimethylsilyl) propionic-2,2,3,3-*d*<sub>4</sub> acid, sodium salt as the internal chemical shift standard ( $\delta$  0.00 ppm). IR spectra were obtained using a Nicolet Avatar 360 FT-IR instrument, equipped with an ATR sampling accessory (Spectra Tech, Inc.). A few drops of the solution were applied to the surface of a ZnSe ATR plate horizontal parallelogram (45°, Wilmad). After the solvent evaporated, the spectrum was acquired (typically at 2-cm<sup>-1</sup> resolution). Mass spectra (MS) were obtained at the Nebraska Center for Mass Spectrometry. Low molecular weight nitroxides were analyzed by fast atom bombardment (FAB) MS, using 3-nitrobenzyl alcohol (3-NBA) or 1-(2-Nitrophenoxy)octane (Ortho-NitroPhenylOctylEther = ONPOE) as matrices, and electrospray ionization (ESI) MS, using sodium acetate in methanol/water.

Water was purified using a Nanopure Water System (Barnstead). Values of pH were measured using Corning pH/Ion Analyzer 350. Dialyses of ORCA were carried out using GeBAFlex tubes with a cut-off molecular weight of 3500 Daltons.

## Section 2. Synthetic Protocols

**2.a Synthesis of nitroxide radicals 1-OH and 1-NHS.** Syntheses of **1** and **1-NHS** are summarized by the equations below, and described in detail in the remainder of this subsection. The starting nitroxide radical **2** was prepared according to the literature procedure<sup>1,2</sup>. Purity for all synthesized nitroxide radicals **2-Br**, **1-OH**, and **1-NHS** is confirmed by EPR spectroscopic spin concentrations (90–100%) and paramagnetic <sup>1</sup>H NMR spectra (Figs. S4, S7, and S8).

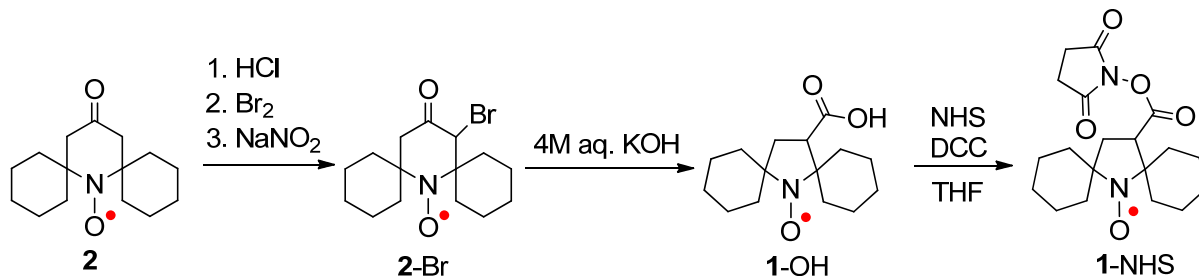

Protocol for nitroxide **2-Br** and its reduction to the corresponding hydroxylamine.

| Run No. | SM (g/mmol)<br>[mL of EtOH] | HCl (mL/mmol)<br>[mL of conc. HCl diluted to 10 mL with EtOH] | Br <sub>2</sub> (mL/mmol) <sup>a</sup> | Bromination                        | 1 M NaNO <sub>2</sub> in H <sub>2</sub> O (mL/mmol) | Yield (g/%) | Spin Conc. (%) |
|---------|-----------------------------|---------------------------------------------------------------|----------------------------------------|------------------------------------|-----------------------------------------------------|-------------|----------------|
| 1       | 1.000/4.00<br>[5.0]         | 2.4/5.2<br>[1.82]                                             | 3.65/4.0                               | 3 min at -100 °C<br>25 min at r.t. | 3.5/3.5                                             | 0.687/52    |                |
| 2       | 0.917/3.67<br>[4.5]         | 2.3/4.8<br>[1.75]                                             | 2.01/3.7                               | 3 min at -100 °C<br>25 min at r.t. | 3.2/3.2                                             | 0.717/59    |                |
| 3       | 2.933/11.7<br>[14]          | 7.4/15.5<br>[1.75]                                            | 5.5/11.9                               | 3 min at -100 °C<br>30 min at r.t. | 10.2/10.2                                           | 1.865/48    |                |
| 4       | 1.618/6.46<br>[6.5]         | 4.0/8.4<br>[1.74]                                             | 4.0/6.5                                | 3 min at -10 °C<br>30 min at r.t.  | 9/9                                                 | 1.193/56    |                |
| 5       | 1.395/5.57<br>[6.0]         | 3.7/7.7<br>[1.74]                                             | 3.7/6.0                                | 3 min at -10 °C<br>30 min at r.t.  | 12/12                                               | 1.109/60    | 94             |
| 6       | 1.125/4.49<br>[4.6]         | 2.8/5.8<br>[1.74]                                             | 2.2/3.6                                | 3 min at -10 °C<br>32 min at r.t.  | 10/10                                               | 0.652/44    |                |

<sup>a</sup> 1 – 2 M solutions of Br<sub>2</sub> in CHCl<sub>3</sub>

Procedure based on run no. 5. Our procedure is based upon previous report for bromination of 4-oxo-TEMPO to the corresponding bromo-nitroxide<sup>3</sup>. In a 25 mL conical flask, nitroxide radical **2** (1.395 g, 5.57 mmol) was suspended in ethanol (6.0 mL) and cooled in an ice water bath. A solution of HCl (3.7 mL, 7.73 mmol, 1.3 equiv, made by diluting 1.74 mL of concentrated HCl to 10 mL with ethanol) was added and briefly stirred, forming a yellow colloid. The reaction mixture was then stirred at room temperature for 90 min during which time the yellow colloid became white. The reaction mixture was then concentrated under a stream of nitrogen, evacuated, and charged with nitrogen. The resultant white solid was suspended in chloroform (4.2 mL), and cooled to -10 °C in an acetone/water ice bath, a solution of bromine in chloroform (3.7 mL, 6.0 mmol, 1.0 equiv, prepared by adding 5.0 mL of chloroform to 0.40 mL

of bromine) was added dropwise, forming a dark red solution. The reaction mixture stirred at  $-10\text{ }^{\circ}\text{C}$  for 3 min, and then at room temperature for 30 min, over which time the solution became light brown. Then, an aqueous solution of  $\text{NaNO}_2$  (1 M, 12 mL, 12 mmol, 2.0 equiv) was added and the reaction mixture immediately became dark brown and a brown gas was evolved. The reaction mixture was stirred at room temperature for 1 h, during which time the color became light orange. The reaction mixture was transferred to a separatory funnel with chloroform (100 mL) and washed with water (75 mL). The organic layer was dried over anhydrous  $\text{MgSO}_4$  and concentrated with a rotatory evaporator. The crude (2.096 g) was dissolved in chloroform/hexanes (1:1), and then purified by column chromatography (silica gel, hexanes/ethyl ether, 6:1) Initially, a light yellow band, corresponding to an unknown by-product, is eluted, followed by the deep orange band of the product, which after evaporation of solvents, yields bromo-nitroxide **2-Br** as a crystalline orange solid (1.109 g, 60%). m.p.  $83\text{--}86\text{ }^{\circ}\text{C}$ . IR (ZnSe,  $\text{cm}^{-1}$ ): 2927, 2858, 1717 (C=O), 1526, 1456, 1446, 1396, 1340, 1314, 1260, 1228, 1203, 1174, 1063, 925, 856, 736, 705. EPR (X-band):  $g = 2.0067$ ,  $a_N = 15.2\text{ G}$ , spin concentration = 94% (1.0 mM in  $\text{CHCl}_3$ ). LR FAB-MS (ONPOE, negative ions):  $m/z$  ion type (%RA = percent relative amplitude for  $m/z$  240–750) 330.0  $[\text{M}+2\text{H}]^-$  (100%), 331.9  $[\text{M}+2+2\text{H}]^-$  (100%).

**Reduction of bromo-nitroxide 2-Br to the corresponding hydroxylamine using phenylhydrazine.** Bromo-nitroxide **2-Br** (2 mg) was dissolved in  $\text{CDCl}_3$  and the  $^1\text{H}$  NMR (400 MHz) spectrum was obtained (label: JTP-3-100f1\_before). Then 6 drops of a solution of phenylhydrazine in  $\text{CDCl}_3$  (3 drops of phenylhydrazine in 1 mL  $\text{CDCl}_3$ ) was added and shaken for 10 minutes. The solution lost its orange color and nitrogen was evolved.  $^1\text{H}$  NMR (400 MHz) was obtained (label: JTP-3-100f1\_after) showing formation of the corresponding diamagnetic hydroxylamine (Fig. S6).

#### Protocol for nitroxide 1-OH.

| Run No. | SM (g/mmol) | KOH (mL/mmol) <sup>a</sup> | Reaction Time (h) | Yield (mg/%) |
|---------|-------------|----------------------------|-------------------|--------------|
| 1       | 0.287/0.872 | 12/43.6                    | 37                | 78/34        |
| 2       | 0.552/1.68  | 20/88.9                    | 71                | 149/33       |
| 3       | 0.521/1.58  | 20/87.0                    | 30                | 169/40       |
| 4       | 1.193/3.62  | 46/184                     | 66                | 411/43       |
| 5       | 0.308/0.935 | 11.7/45.6                  | 112               | 147/59       |

<sup>a</sup> 3.5 – 4.5 M solutions of KOH in water

Procedure based on run no. 5. Bromo-nitroxide **2-Br** (308 mg, 0.935 mmol) was suspended in aq. KOH (4 M, 11.7 mL, 46.8 mmol) and stirred for five days in darkness. After two days all starting material had dissolved giving a cloudy mixture with sticky red pieces of an unknown by product. After three days, the solution was clear but the sticky pieces were still present. After five days the reaction mixture was transferred to a separatory funnel and washed with chloroform ( $2 \times 50\text{ mL}$ ) removing a pink color. The separatory funnel and chloroform solution were cooled in water ice, then an aqueous solution of  $\text{NaHSO}_4$  (1.5 M, 38 mL, 57 mmol) was added and immediately extracted with chloroform ( $6 \times 100\text{ mL}$ ). The chloroform extracts

were combined, washed with water (250 mL) and dried over anhydrous MgSO<sub>4</sub>. Evaporation in rotary evaporator gave a crude solid (218 mg) which was dissolved in chloroform and purified by column chromatography (silica gel, chloroform/ethyl ether, 4:1). The yellow product was the only visible band, which after evaporation gave nitroxide **1-OH** as a yellow powder (147 mg, 59%). m.p. 191–193 °C. EPR (X-band):  $g = 2.0064$ ,  $a_N = 14.6$  G, spin concentration  $\approx 100\%$ . IR (cm<sup>-1</sup>): 2934, 2921, ~2900 (broad, COO-H), 2874, 2853, 1719 (C=O), 1449, 1410, 1312, 1283, 1268, 1206, 1176, 1159, 1135, 907, 688, 671. HR FAB-MS (matrix: 3-NBA): 268.1915 (100%, [M+2H]<sup>+</sup> -0.9 ppm for C<sub>15</sub>H<sub>26</sub>NO<sub>3</sub>), 267.1823 (9%, [M+H]<sup>+</sup> 4.2 ppm for <sup>12</sup>C<sub>15</sub><sup>1</sup>H<sub>25</sub><sup>14</sup>N<sup>16</sup>O<sub>3</sub>), 266.1759 (17%, [M]<sup>+</sup> -1.0 ppm for <sup>12</sup>C<sub>15</sub><sup>1</sup>H<sub>24</sub><sup>14</sup>N<sup>16</sup>O<sub>3</sub>).

#### Protocol for nitroxide **1-NHS**.

| Run No. | SM (mg/mmol) | NHS (mg/mmol) | DCC (mg/mmol) | THF (mL) | Reaction time (h) | Yield (mg/%) | Spin Conc. (%) |
|---------|--------------|---------------|---------------|----------|-------------------|--------------|----------------|
| 1       | 123/0.462    | 41/0.356      | 98/0.475      | 4.0      | 67                | 314/90       |                |
| 2       | 132/0.496    | 59/0.513      | 105/0.509     | 6.0      | 72                |              |                |
| 3       | 91/0.342     | 54/0.469      | 94/0.456      | 5.8      | 45                | 99/80        |                |
| 4       | 39/0.146     | 28/0.243      | 45/0.218      | 2.6      | 71                | 47/88        | 98             |
| 5       | 161/0.604    | 104/0.904     | 153/0.742     | 10.6     | 70                | 195/89       | ~100           |

Procedure based on run no. 5. Nitroxide radical **1-OH** (161 mg, 0.604 mmol), *N*-hydroxysuccinimide (NHS, 104 mg, 0.904 mmol), and *N,N'*-dicyclohexylcarbodiimide (DCC, 153 mg, 0.742 mmol) were charged to a 25 mL round bottom flask, briefly evacuated and filled with nitrogen. THF (10.6 mL, freshly distilled from sodium and benzophenone) was added and the resultant yellow solution was stirred at r.t. protected from light for three days. After eight hours a precipitate formed which remained through work up. After three days the reaction mixture was evaporated with a rotary evaporator and filtered through cotton with dichloromethane, evaporation of which yielded a crude solid (360 mg). The crude was dissolved in chloroform and purified by column chromatography (silica gel, chloroform/acetone, 97:3). The product was eluted first as a yellow band followed by an orange band of by-product. Evaporation of solvents yielded active ester **1-NHS** as a yellow-orange powder (195 mg, 89%). m.p. 182–184 °C. EPR (X-band)  $g = 2.0065$ ,  $a_N = 14.6$  G, spin concentration:  $\sim 100\%$ . IR (ZnSe, cm<sup>-1</sup>): 2930, 2858, 1809, 1782, 1737 (C=O), 1450, 1368, 1202, 1064, 1047, 993, 949, 908, 894, 813, 752, 736, 646. HR ESI-MS (MeOH/water, 3:1 and sodium acetate): 386.1814 ([M+Na]<sup>+</sup> 0.5 ppm for C<sub>19</sub>H<sub>27</sub>N<sub>2</sub>O<sub>5</sub>Na).

## 2.b EPR and $^1\text{H}$ NMR spectroscopic analyses of nitroxide radicals

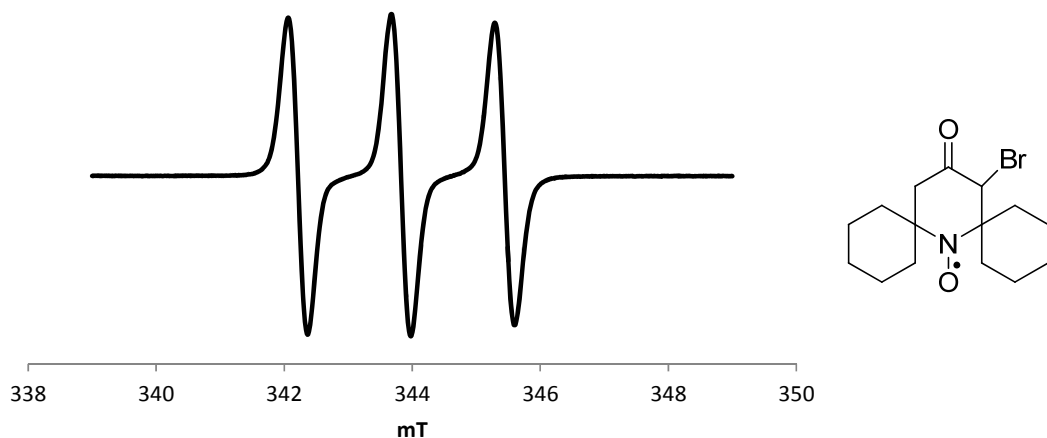

**Fig. S1.** EPR (X-band) spectrum of 1.0 mM **2-Br** in  $\text{CHCl}_3$  for determination of spin concentration (sample label: jtp-3-100f1, EPR label: JP532r7).

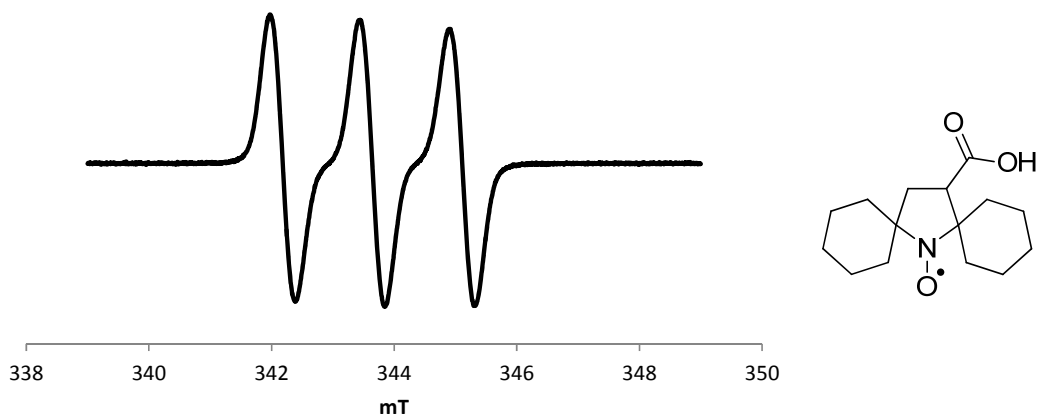

**Fig. S2.** EPR (X-band) spectrum of 1.1 mM nitroxide radical **1-OH** in  $\text{CHCl}_3$  for determination of spin concentration (sample label: JTP-4-08f1, EPR label: JP528r12).

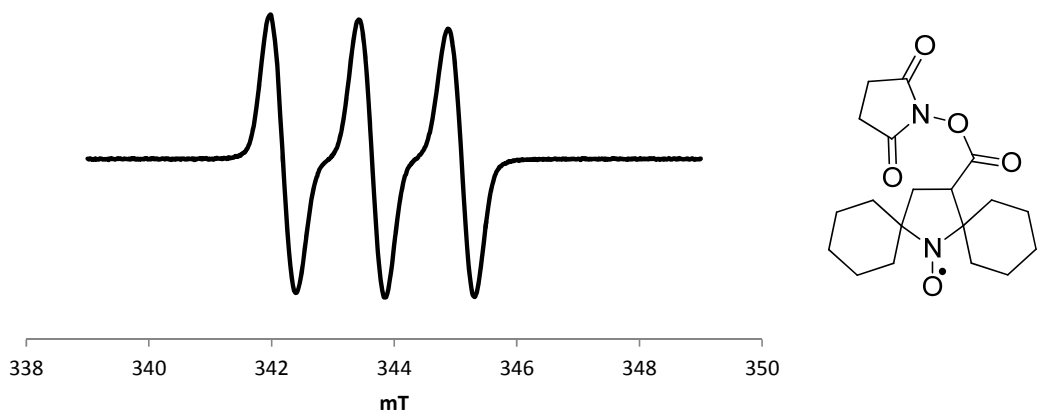

**Fig. S3.** EPR (X-band) spectrum of 1.0 mM nitroxide radical **1-NHS** in  $\text{CHCl}_3$  for determination of spin concentration (sample label: JTP-3-41f1, EPR label: JP528r10).

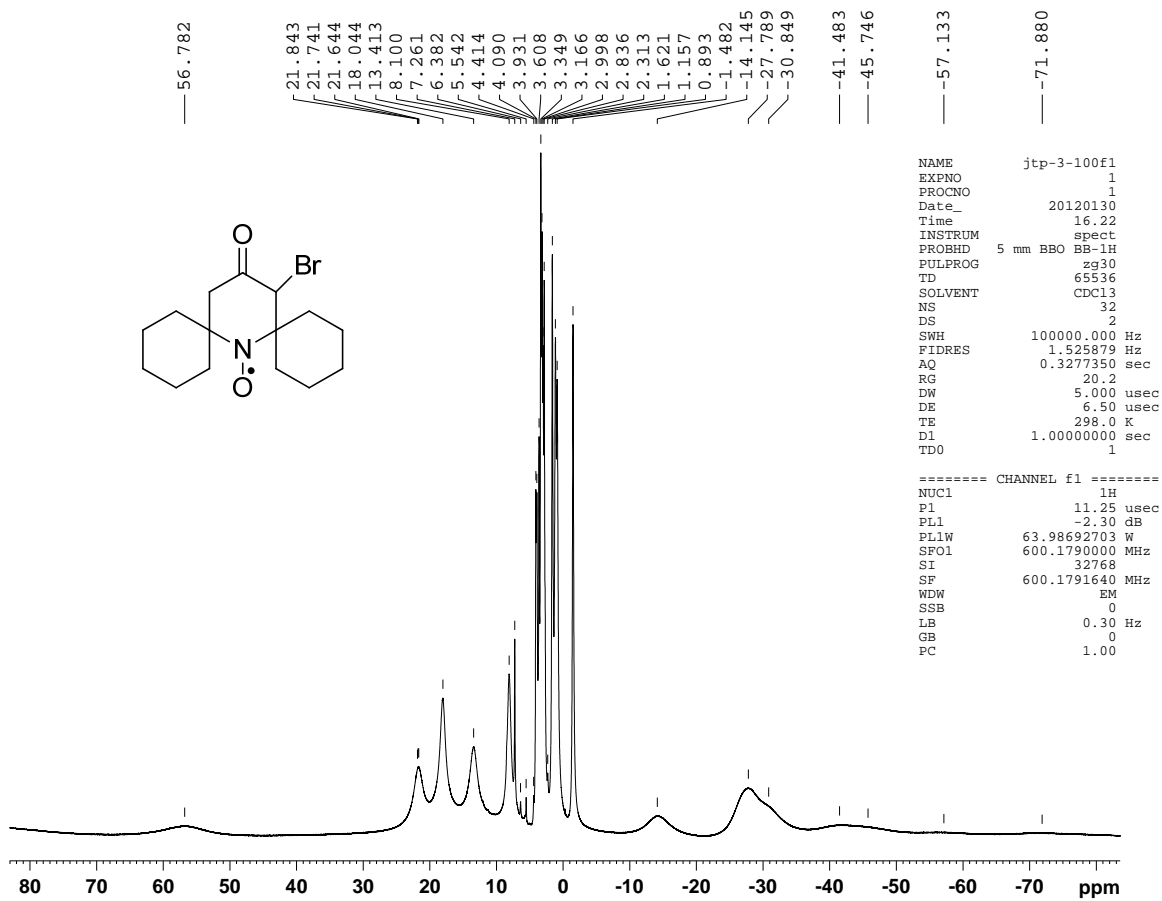

**Fig. S4.**  $^1\text{H}$  NMR spectrum (600 MHz,  $\text{CDCl}_3$ ) of bromo nitroxide **2-Br** (sample and NMR label: JTP-3-100f1).

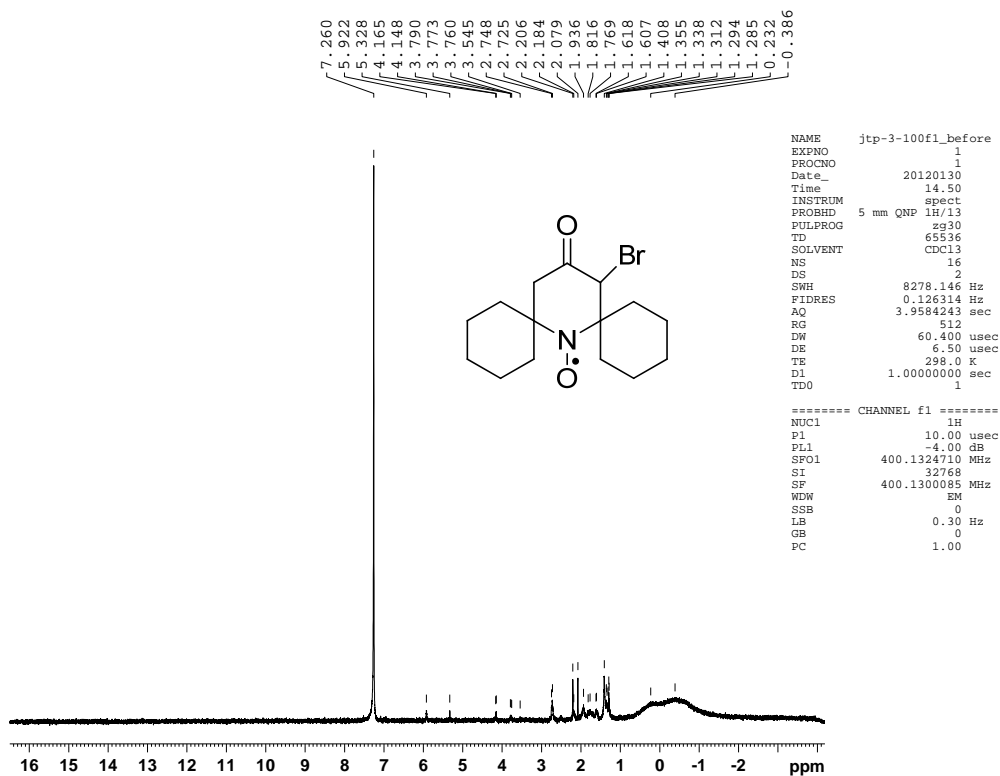

**Fig. S5.**  $^1\text{H}$  NMR spectrum (400 MHz,  $\text{CDCl}_3$ ) of dilute 2-Br prior to reaction with phenylhydrazine (NMR label: JTP-3-100f1\_before).

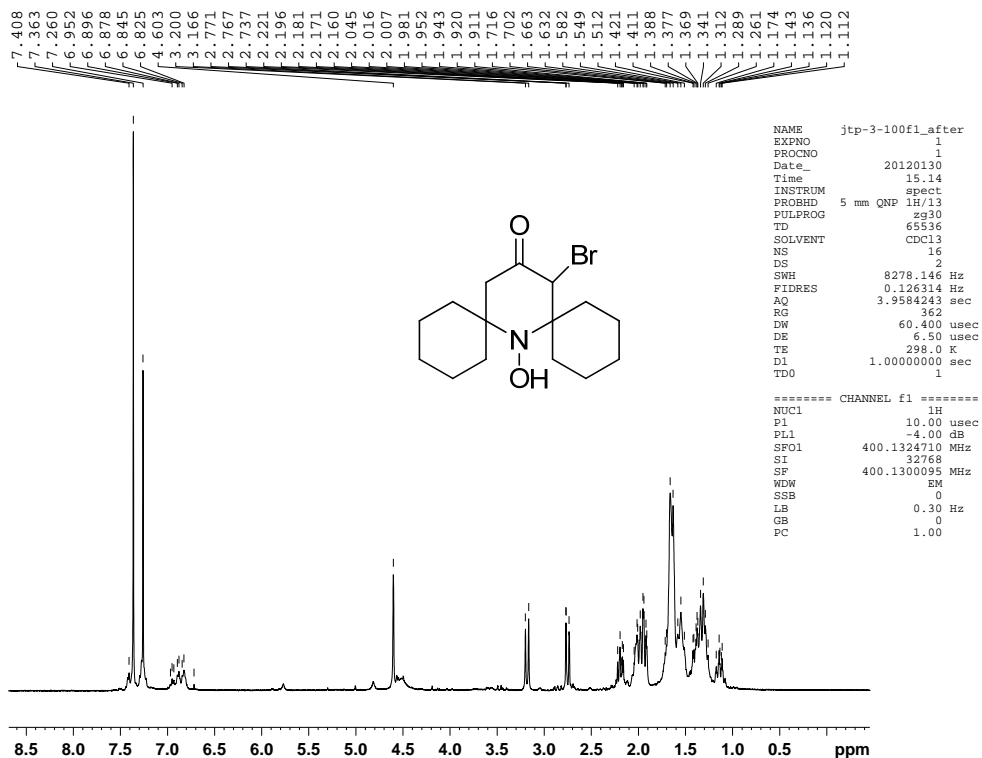

**Fig. S6.**  $^1\text{H}$  NMR spectrum (400 MHz,  $\text{CDCl}_3$ ) of the reaction mixture of 2-Br with phenylhydrazine (NMR label: JTP-3-100f1\_after).



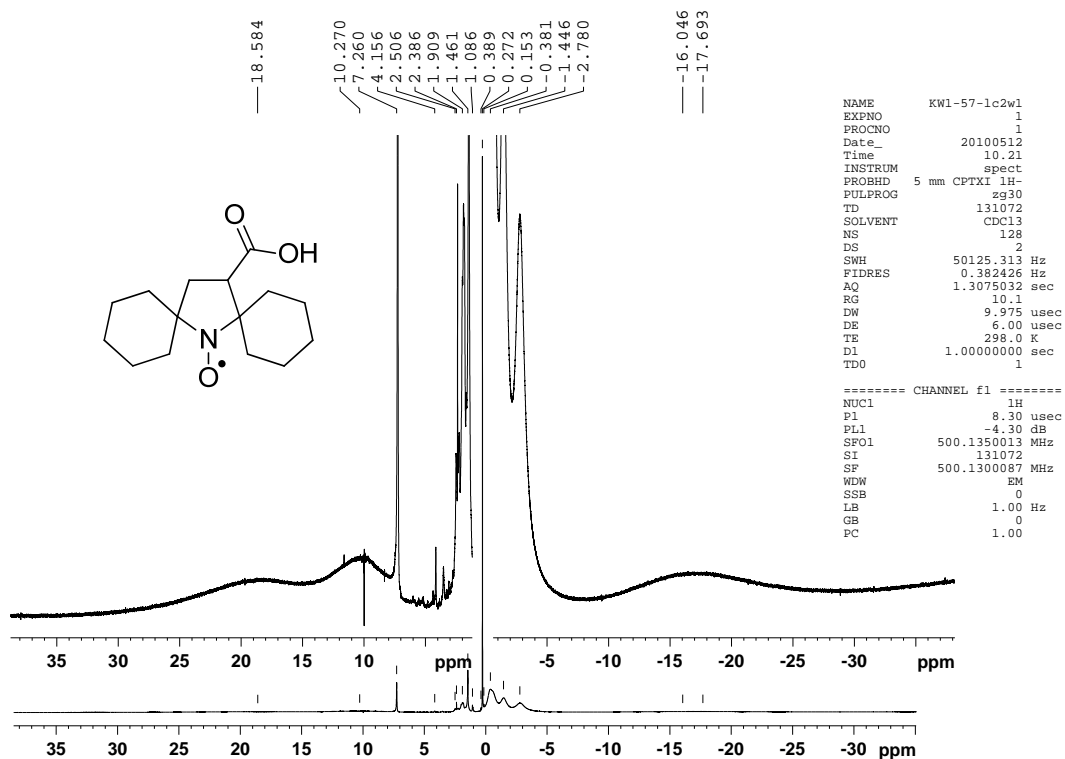

**Fig. S7.** <sup>1</sup>H NMR spectrum (400 MHz, CDCl<sub>3</sub>) of nitroxide radical **1-OH** (sample label: KW1-57-1c2w).

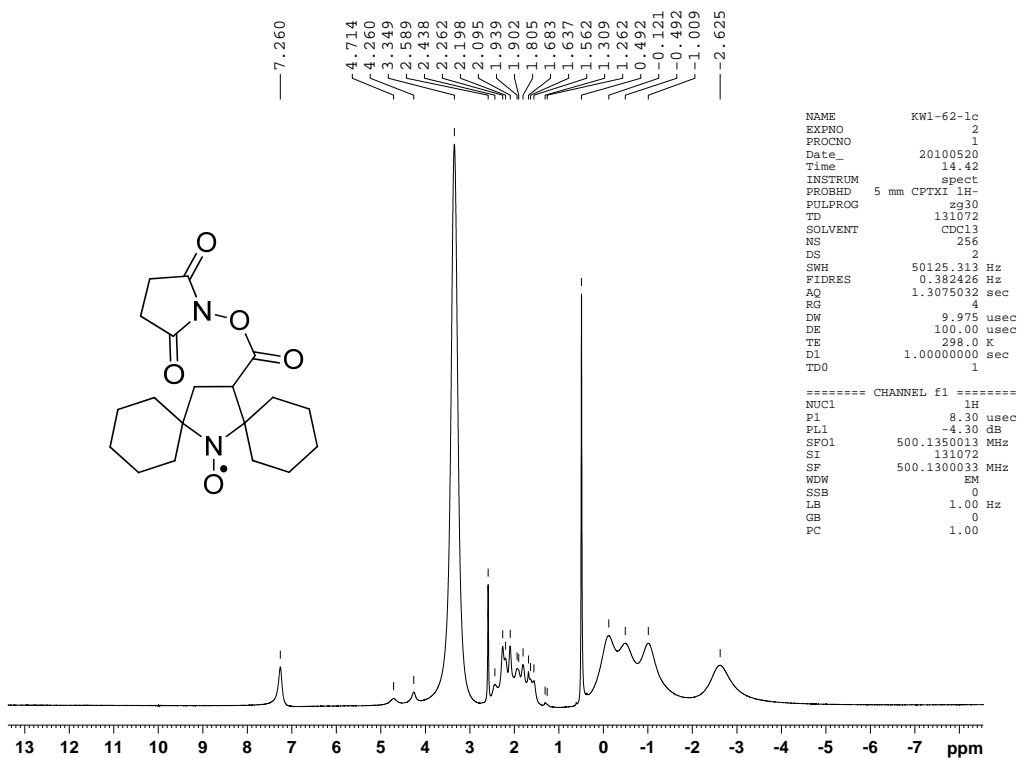

**Fig. S8.** <sup>1</sup>H NMR spectrum (400 MHz, CDCl<sub>3</sub>) of nitroxide radical **1-NHS** (sample label: KW1-62-1c).

## 2.c Synthesis of organic radical contrast agents (ORCA).

Protocol for ORCAs based on **1-mPEG-G4**. PPI G4 dendrimer (33.6 mg, 4.70  $\mu\text{mol}$ ) and nitroxide radical **1-NHS** (36.2 mg, 99.7  $\mu\text{mol}$ , 21 equiv, sample label: jtp0269f1) were weighed in a glovebag, and then dried under high vacuum for overnight. Then in the glovebag, a solution of PPI G4 dendrimer in anhydrous DMF (1.2 mL), and Hünig's base (60.0  $\mu\text{L}$ , 73.5 equiv) were transferred to a Schlenk vessel. The Schlenk vessel was attached to high vacuum line, and then nitroxide radical **1-NHS**, as a solution in anhydrous DMF (0.4 mL) and anhydrous THF (0.4 mL), was added dropwise under inert gas flow (nitrogen or argon). The reaction mixture was lightly opaque during the addition of **1-NHS**, but turned into a clear light yellow solution after stirring for 20 min. After 6 days at room temperature in the absence of light, the homogenous reaction mixture was observed, though in some runs, a small amount of precipitate pasted on the wall of the Schlenk vessel was observed. Then to this solution, mPEG-12-NHS (174.8 mg, 267.2  $\mu\text{mol}$ , 54 equiv) in anhydrous DMF (0.6 mL) was added. The reaction mixture was stirred at ambient temperature in the absence of light for another 6 days. The almost homogenous mixture with a small amount of suspended flocculent precipitate was centrifuged, and the precipitate was washed with DMF and centrifuged ( $\times 3$ ). The combined clear DMF solutions were concentrated under dry nitrogen gas flow. Purification of the resultant clear pasty compound by dialysis (3500 D membrane) provided the product as yellow, clear, pasty solids with isolated yields of 81–97%. In this particular run, 151.4 mg (88%) of **1-mPEG-G4** (sample label: yw0380B3) was obtained.

**Table S1.** Expanded version of Table 1 in the main text.

| Sample label     | ORCA         | G | N  | x (nitroxide equiv) | y (mPEG-12 equiv) | Spin Conc. (mmol g <sup>-1</sup> ) | R <sub>1</sub> (mM <sup>-1</sup> s <sup>-1</sup> ) <sup>a</sup> | $\tau_{\text{rot}}$ (ns) | j (radical) | m (mPEG) | m/j  | Surface Coverage (%) |
|------------------|--------------|---|----|---------------------|-------------------|------------------------------------|-----------------------------------------------------------------|--------------------------|-------------|----------|------|----------------------|
| yw0380B3         | 1-mPEG-G4    | 4 | 64 | 21                  | 54                | 0.41                               | 0.450                                                           | 1.4                      | 12.6        | 35.8     | 2.84 | 75.6                 |
| yw0380A3         | 1-mPEG-G4    | 4 | 64 | 21                  | 54                | 0.40                               | -                                                               | -                        | 13.4        | 38.8     | 2.90 | 81.6                 |
| yw0339C3         | 1-mPEG-G4    | 4 | 64 | 21                  | 54                | 0.42                               | -                                                               | 1.5                      | -           | -        | -    | -                    |
| yw0509A4         | 1-mPEG-G4    | 4 | 64 | 22                  | 64                | 0.41                               | 0.419                                                           | 1.6                      | 13.6        | 40.3     | 2.96 | 84.2                 |
| yw0488-5         | 1-mPEG-G4    | 4 | 64 | 22                  | 65                | 0.42                               | 0.401                                                           | -                        | 13.4        | 38.7     | 2.89 | 81.4                 |
| yw0227-4         | 1-mPEG-G3    | 3 | 32 | 11                  | 25                | 0.45                               | 0.355                                                           | 0.80                     | -           | -        | -    | -                    |
| yw0425-3         | 1-mPEG-G3    | 3 | 32 | 11                  | 25                | 0.46                               | 0.385                                                           | 0.88                     | -           | 20       | 2.5  | 86                   |
| yw0387-4         | 1-mPEG-G2    | 2 | 16 | 6                   | 15                | 0.48                               | 0.304                                                           | 0.50                     | 4           | 10       | 2.5  | 90                   |
| yw0427-3         | 1-mPEG-G2    | 2 | 16 | 6                   | 15                | 0.43                               | 0.282                                                           | 0.47                     | -           | -        | -    | -                    |
| yw0389cr2        | 1-mPEG-G0    | 0 | 4  | 1                   | 5                 | 0.23                               | 0.211                                                           | 0.25                     | -           | -        | -    | -                    |
| yw0357-5         | 1-G4         | 4 | 64 | 70                  | 0                 | 2.38                               | -                                                               | -                        | 42          | -        | 0    | 65                   |
| yw0495-2         | 1-G4         | 4 | 64 | 80                  | 0                 | 2.34                               | -                                                               | -                        | 40          | -        | 0    | 63                   |
| yw0358-3         | mPEG-G4      | 4 | 64 | 0                   | 70                | 0                                  | -                                                               | -                        | 0           | 59       | -    | 92                   |
| yw0233-5         | 3-CP-mPEG-G4 | 4 | 64 | 21                  | 52                | 0.53                               | 0.331                                                           | 0.90                     | -           | -        | -    | -                    |
| yw0419-3         | 3-CP-mPEG-G4 | 4 | 64 | 21                  | 52                | 0.46                               | 0.336                                                           | 0.80                     | -           | -        | -    | -                    |
| 3-Carboxy-Proxyl | 3-CP         | - | -  | -                   | -                 | -                                  | 0.14                                                            | 0.045                    | -           | -        | -    | -                    |

<sup>a</sup> R<sub>1</sub> (mM<sup>-1</sup>s<sup>-1</sup>) per S = 1/2 nitroxide radical.

### *Protocols for reduction of ORCA for the end group analysis by <sup>1</sup>H NMR spectroscopy.*

Protocol based on the run with notebook label: yw03-99. A sample of **1-mPEG-G4** (2.60 mg, spin concentration of 0.41 mmol/g, sample label: yw03-80B-3) was placed in a vial and dissolved in PBS buffer (0.15 mL, 71.6 mM, 10.1 equiv, prepared from equivalent amount of Na<sub>2</sub>HPO<sub>4</sub> and NaH<sub>2</sub>PO<sub>4</sub>) in D<sub>2</sub>O. Then, 0.14 mL of this solution of **1-mPEG-G4** was transferred to 3-mm NMR tube, and then ascorbate (3.0 equiv, 20  $\mu\text{L}$  of 150 mM solution in D<sub>2</sub>O) was added. The mixture was shaken to make a homogenous solution and kept at ambient temperature with exclusion of light for 15 h. <sup>1</sup>H NMR spectrum, obtained after the addition of 0.05 wt% 3-(trimethylsilyl) propionic-2,2,3,3-*d*<sub>4</sub> acid, sodium salt as the internal chemical shift standard ( $\delta$  0.00 ppm), suggested that the degree of reduction was sufficient for the end group analysis.

Purification of the reaction mixture by dialysis (3500 D membrane, 8 h in pure water) was followed by concentration, and then drying under high vacuum overnight, to provide a yellow pasty product corresponding to the reduced **1**-mPEG-G4 (1.92 mg, yield 74%, sample label: yw03-80B-3DR). This product was re-dissolved into 0.15 mL of pure D<sub>2</sub>O and another <sup>1</sup>H NMR spectrum was obtained; end group analysis based on integration of <sup>1</sup>H NMR spectrum showed 35.8 mPEG-12 moieties per ORCA (Fig. S10, top spectrum).

Repeat run (notebook label: yw06-89) was carried out on the same sample of **1**-mPEG-G4 (sample label: yw03-80B-3) in PBS buffer (~85  $\mu$ L of solution with spin concentration of 106 mM), which was recovered from *in vivo* MRI experiments (the sample amount is equivalent to 22.0 mg of neat sample with spin concentration of 0.41 mmol/g). Following the reaction with ascorbate, dialysis, concentration, and drying, the reduced **1**-mPEG-G4 (16.2 mg, yield: 73%, label: yw03-80B-3DR2B) was obtained as a light brown pasty solid. A 2.11 mg portion of the reduced product dissolved in D<sub>2</sub>O to obtain <sup>1</sup>H NMR spectrum; end group analysis based on the integration of <sup>1</sup>H NMR spectrum showed 38.8 mPEG-12 moieties per ORCA (Fig. S10, bottom spectrum). The rest of the reduced product (13.7 mg) was dissolved in DMSO-*d*<sub>6</sub> to obtain <sup>1</sup>H NMR spectrum showing the two amide NH resonances at  $\delta$  7.9 and  $\delta$  10.4 ppm (see: main text and also Fig. S13 for a similar NMR spectrum on another sample). (Attempts to obtain <sup>1</sup>H-<sup>1</sup>H COSY and <sup>1</sup>H-<sup>13</sup>C HMBC spectra in DMSO-*d*<sub>6</sub> were not successful.) Subsequently DMSO-*d*<sub>6</sub> was removed (concentration, brief dialysis, concentration, and drying), to provide recovered product (11.41 mg (label: yw03-80B-3DR2C). This sample was then dissolved in 10% D<sub>2</sub>O in H<sub>2</sub>O, and another set of NMR spectra was obtained (Figs. S14 and S15).

This protocol is for a different sample of **1**-mPEG-G4; run with notebook label: yw05-23. Starting with **1**-mPEG-G4 (3.23 mg, spin concentration of 0.41 mmol/g, sample label: yw05-09A-4), the reduced **1**-mPEG-G4 (2.70 mg, yield: 84%, label: yw05-09A-4DR) was obtained as a light brown pasty solid. End group analysis based on integration of <sup>1</sup>H NMR spectrum showed 40.3 mPEG-12 moieties per ORCA (Fig. S11, top spectrum).

Repeat run (notebook label: yw06-96) was carried out on the same sample of **1**-mPEG-G4 (sample label: yw05-09A-4). Starting with **1**-mPEG-G4 (20.01 mg, spin concentration of 0.41 mmol/g, label: yw05-09A-4), the reduced **1**-mPEG-G4 (14.03 mg, yield: 70%, label: yw05-09A-4DR3) was obtained as a brown pasty solid. A 2.12-mg portion of the reduced product dissolved in D<sub>2</sub>O to obtain <sup>1</sup>H NMR spectrum; end group analysis based on the integration of <sup>1</sup>H NMR spectrum showed 38.7 mPEG-12 moieties per ORCA (Fig. S11, bottom spectrum). Then in nitrogen gas filled glovebag, the rest of the compound (11.9 mg) was dissolved in 100%DMSO-*d*<sub>6</sub> (0.14 mL), and then <sup>1</sup>H NMR spectra were obtained (Fig. S13). (In COSY and HMBC experiments, cross-peaks could not be observed, perhaps due to aggregation of **1**-mPEG-G4 in either DMSO-*d*<sub>6</sub> or DMSO-*d*<sub>6</sub>/chloroform-*d* mixtures (e.g., 2:1, 0.2 mL).

Analogous protocols were used for reduction of **1**-mPEG-G3 and **1**-mPEG-G2; for <sup>1</sup>H NMR spectra in D<sub>2</sub>O, see: Fig. S12.

The NMR spectroscopic samples used for the end group analyses of **1**-mPEG-G4, **1**-mPEG-G3 and **1**-mPEG-G2 showed EPR spectra with significantly decreased linewidth and intensity, indicating partial reduction of nitroxide radicals. Spin concentrations determined by EPR spectroscopy were in the 50–80% range of the values prior to the reduction and end group analysis.

**End group analysis of ORCA: determination of number of nitroxide and mPEG-12 moieties.** The number ( $m$ ) of mPEG-12 moieties was calculated from  $^1\text{H}$  NMR spectra of completely reduced ORCA in  $\text{D}_2\text{O}$ . The calculation is based on the ratio of the integral for the sharp singlet at  $\delta$  3.39 ppm ( $\text{CH}_3\text{O}$  group of mPEG-12) and half-peak integral of broad singlet at  $\delta$  1.91 ppm ( $\text{CH}_2$  groups of the dendrimer core). For a sample of **1**-mPEG-G4, integral at  $\delta$  3.39 ppm was set to 3.00 protons and the integral at  $\delta$  1.91 ppm was found to be 3.46 protons, to give  $m = (3.00/3)/2 \times (3.46/248) = 35.8$ .

Once the number  $m$  was determined, the number ( $j$ ) of attached nitroxide moieties was calculated using spin concentration determined by EPR spectroscopy for ORCA in PBS buffer. The following relationship between spin concentration and the number  $j$  in **1**-mPEG-G4 was used:

$$\text{Spin Conc. (mmol/g)} = 1000 \times j / [7167.8546 - (j+m) \times 1.0079 + j \times 249.3486 + m \times 571.6753]$$

In the above relationship, 7167.8546, 1.0079, 249.3486, and 571.6753 are molecular weights (g/mol) of the dendrimer core, hydrogen atom, nitroxide **1** moiety, and mPEG-12 moiety, respectively.

As illustrated in Fig. S9, for a sample of **1**-mPEG-G4 with  $m = 35.8$  and spin concentration of 0.41 mmol/g, the value of  $j = 12.6$  was found. Similar procedure was implemented for the end group analyses of **1**-mPEG-G3 and **1**-mPEG-G2, as well as for model compounds **1**-G4 and mPEG-G4.

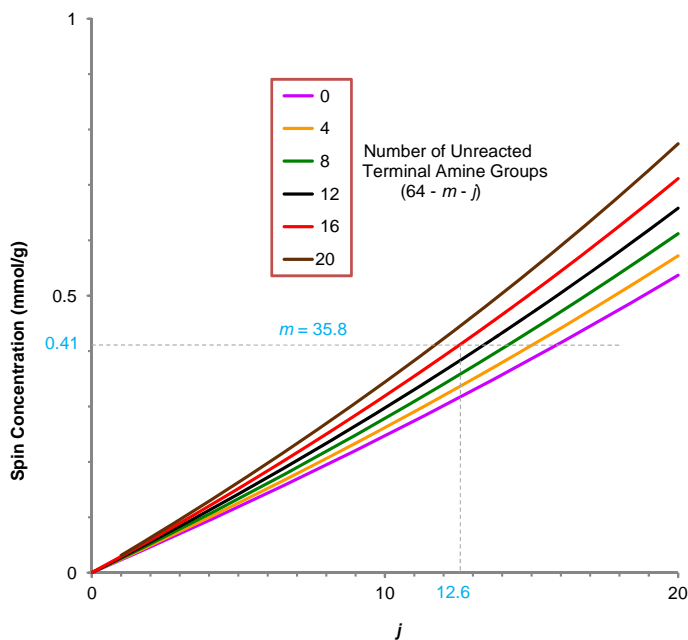

**Fig. S9.** Plot of spin concentration versus the number ( $j$ ) of attached nitroxide moieties for selected numbers of unreacted terminal amine groups ( $64 - m - j$ ) for ORCA **1**-mPEG-G4. For an example sample, the value of  $j = 12.6$  is determined based on independently measured spin concentration (EPR) and value of  $m$  ( $^1\text{H}$  NMR) corresponding to the number of mPEG-12 moieties.

## 2.d NMR and IR spectroscopic analyses of ORCA after reduction with ascorbate.

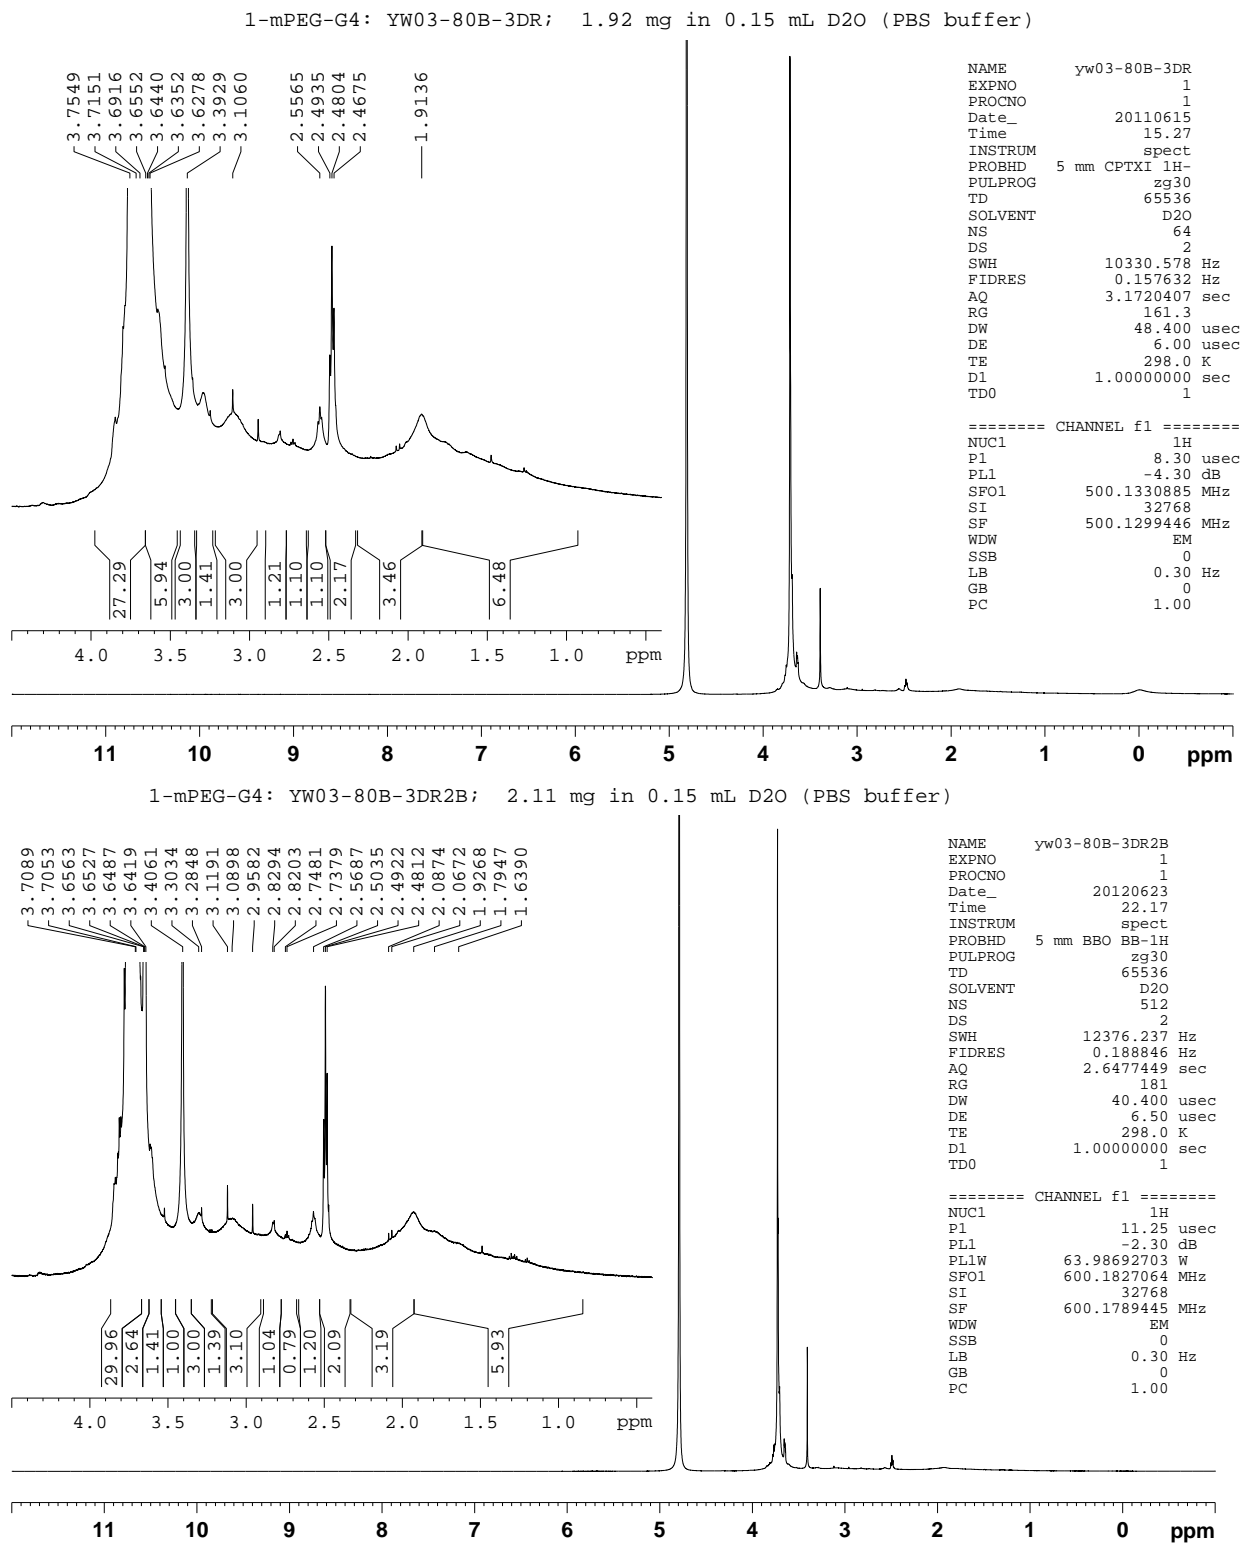

**Fig. S10.** <sup>1</sup>H NMR spectra (500 and 600 MHz, D<sub>2</sub>O) of reduced **1-mPEG-G4**. Top and bottom spectra: two reduction runs on the same sample of **1-mPEG-G4** (sample label: yw0380B3).

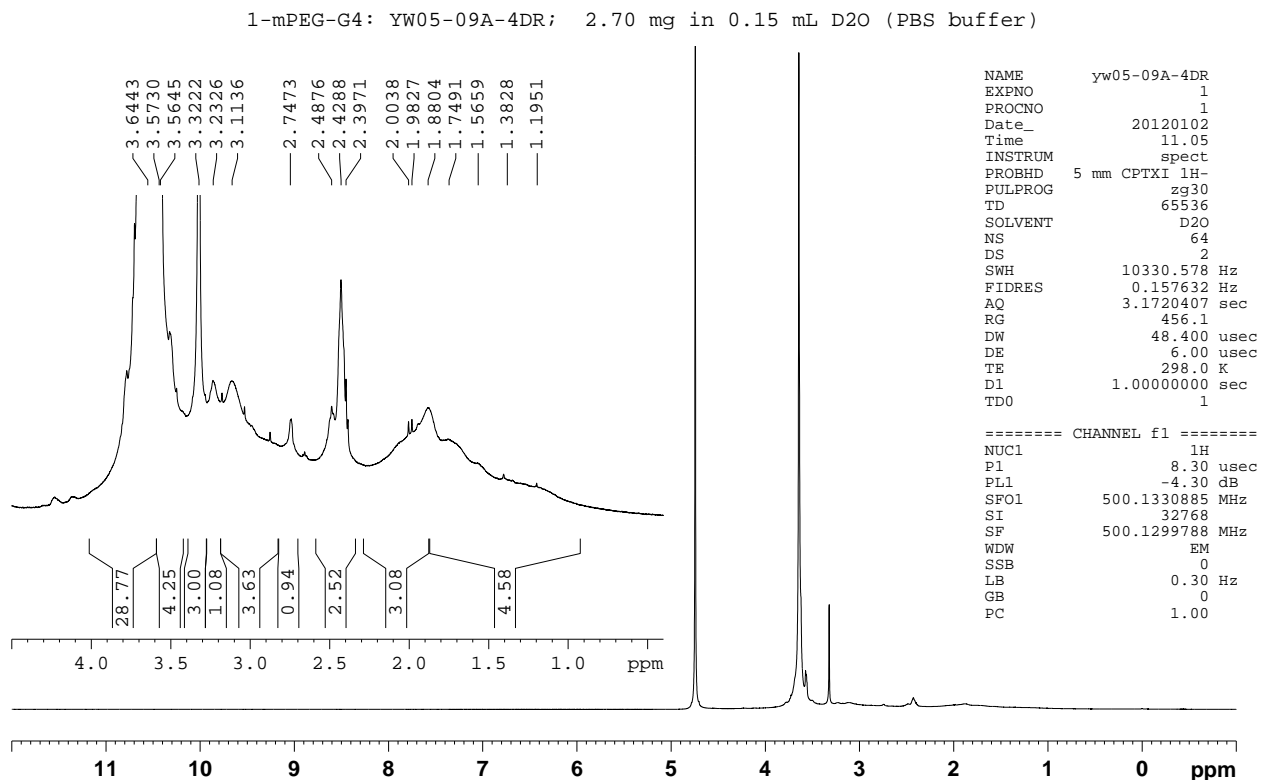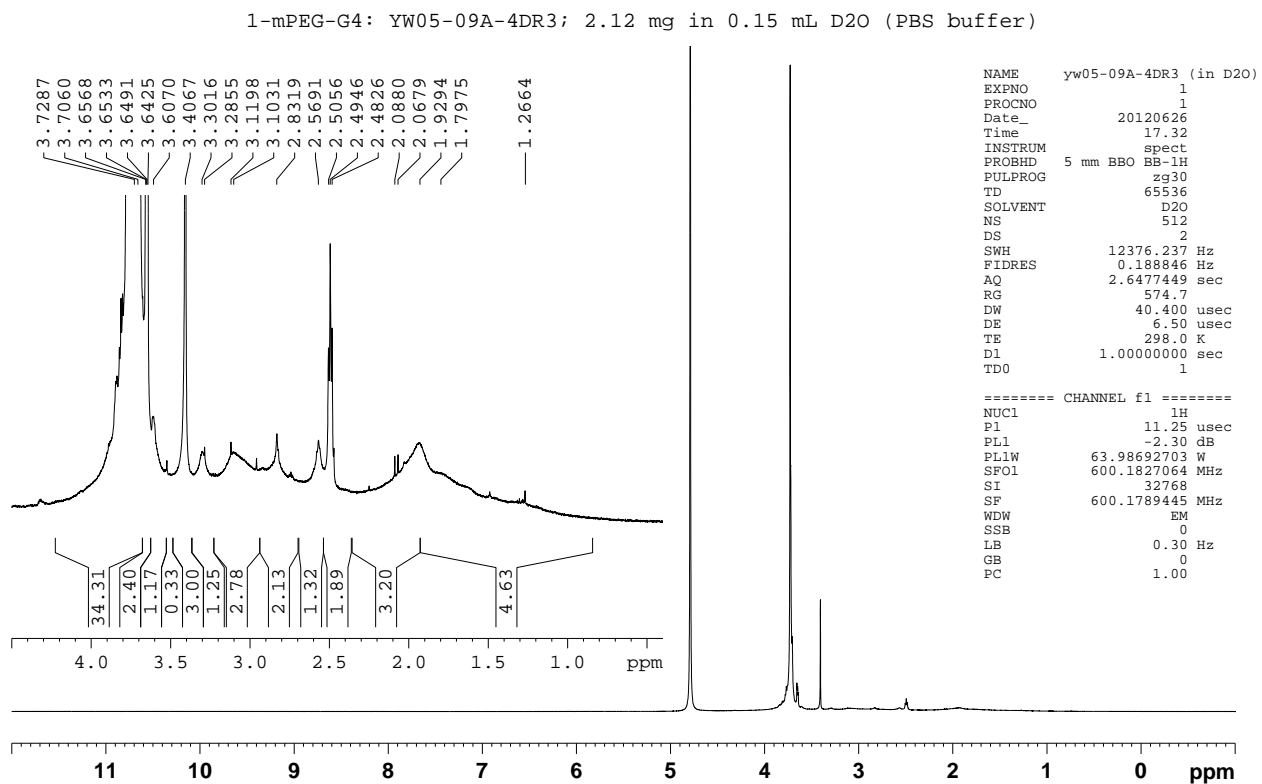

**Fig. S11.**  $^1\text{H}$  NMR spectra (500 and 600 MHz,  $\text{D}_2\text{O}$ ) of reduced **1-mPEG-G4**. Top and bottom spectra: two reduction runs on the same sample of **1-mPEG-G4** (sample label: yw0509A4).

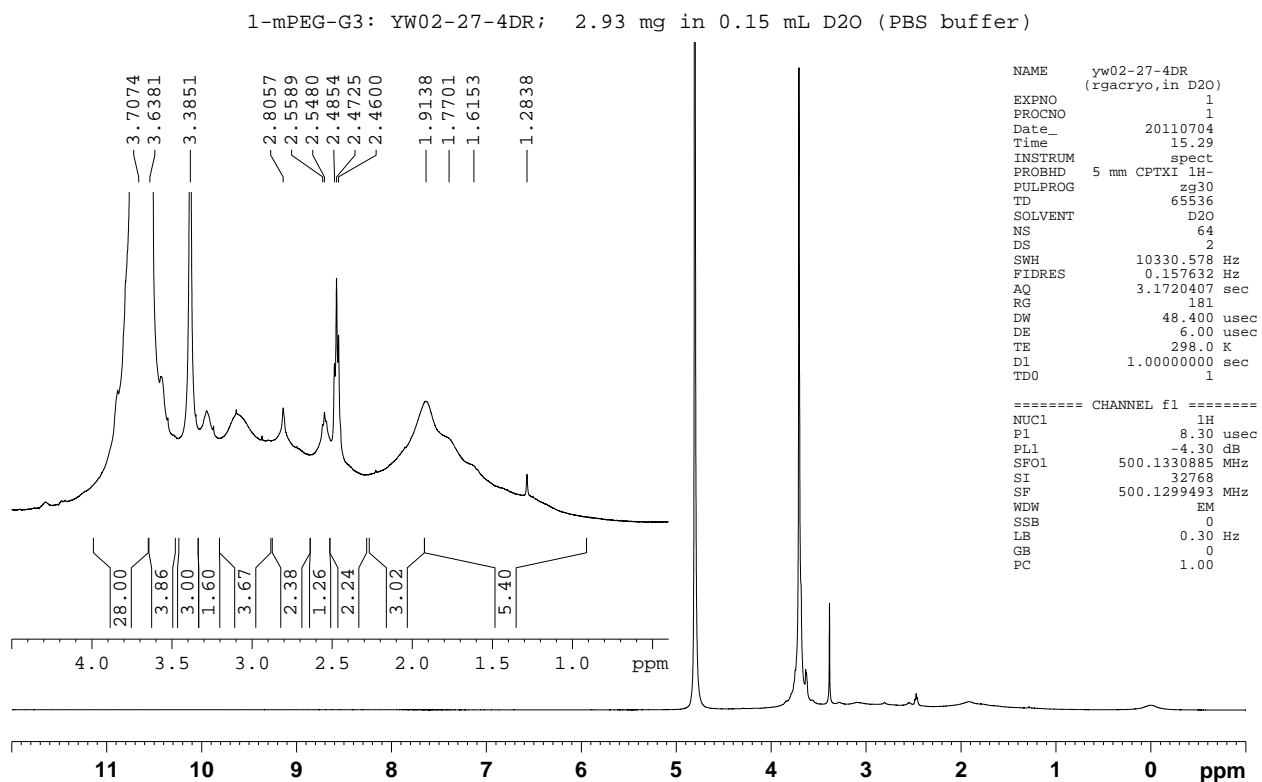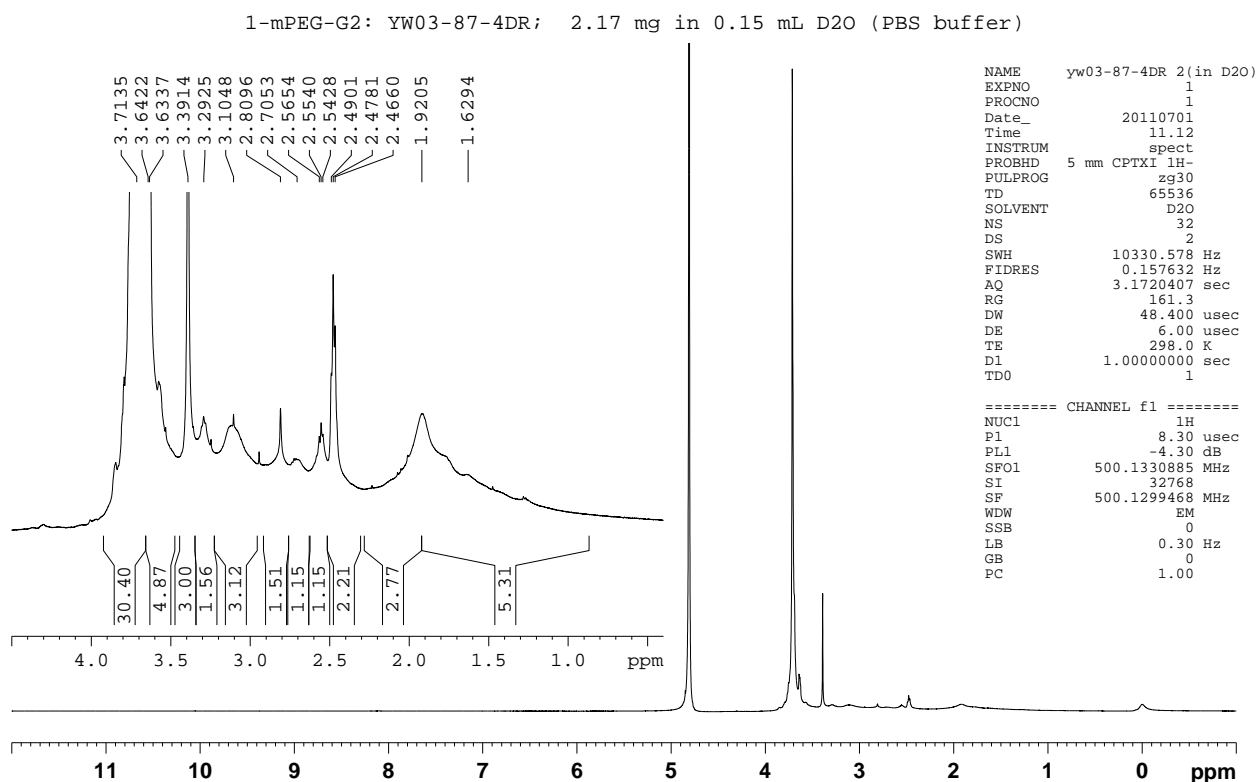

**Fig. S12.**  $^1\text{H}$  NMR spectra (500 MHz,  $\text{D}_2\text{O}$ ) of reduced 1-mPEG-G3 (top spectrum) and 1-mPEG-G2 (bottom spectrum) that were used for the end group analyses.

1-mPEG-G4: YW05-09A-4DR3; 11.9 mg in 0.14 mL 100% D DMSO

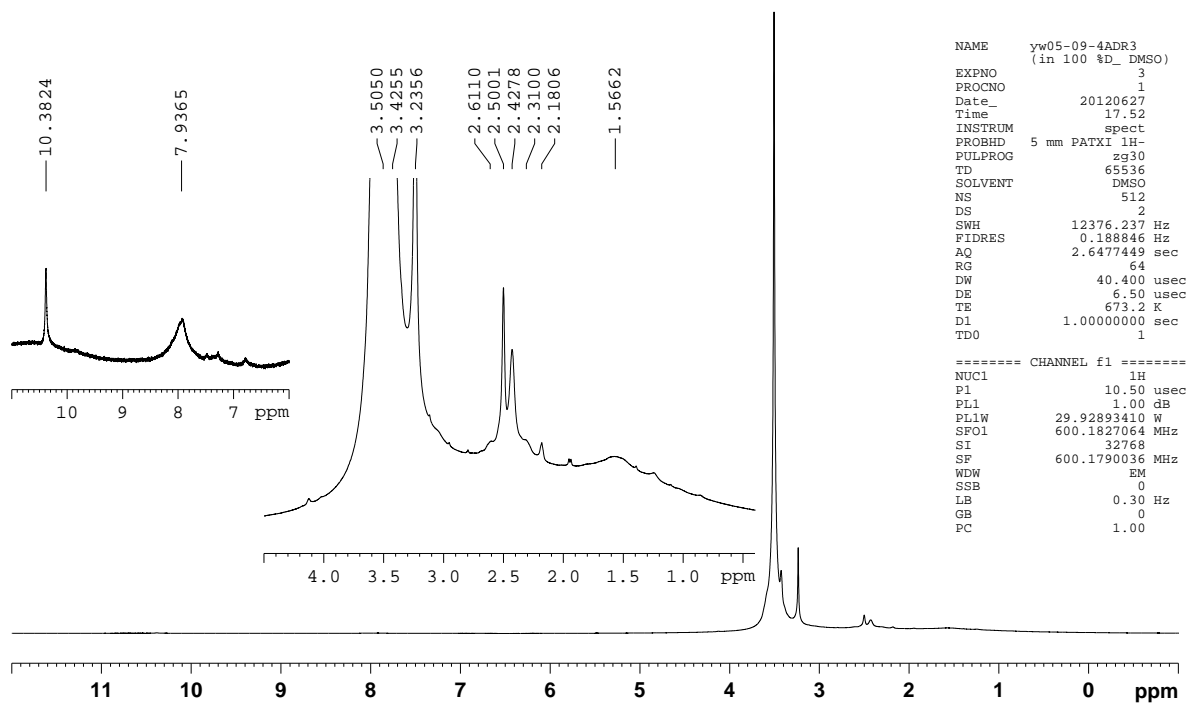

**Fig. S13.**  $^1\text{H}$  NMR spectrum (600 MHz,  $\text{DMSO-}d_6$ ) of reduced **1-mPEG-G4** (sample label before reduction: yw0509A4). Peaks at  $\delta$  10.4 and  $\delta$  7.9 ppm were assigned to NH groups of the amide moieties connecting (reduced) nitroxides and mPEG-12 to the dendrimer core.

1-mPEG-G4: YW03-80B-3DR2C; VT; 11.4 mg in 0.15 mL: 10% D<sub>2</sub>O in H<sub>2</sub>O

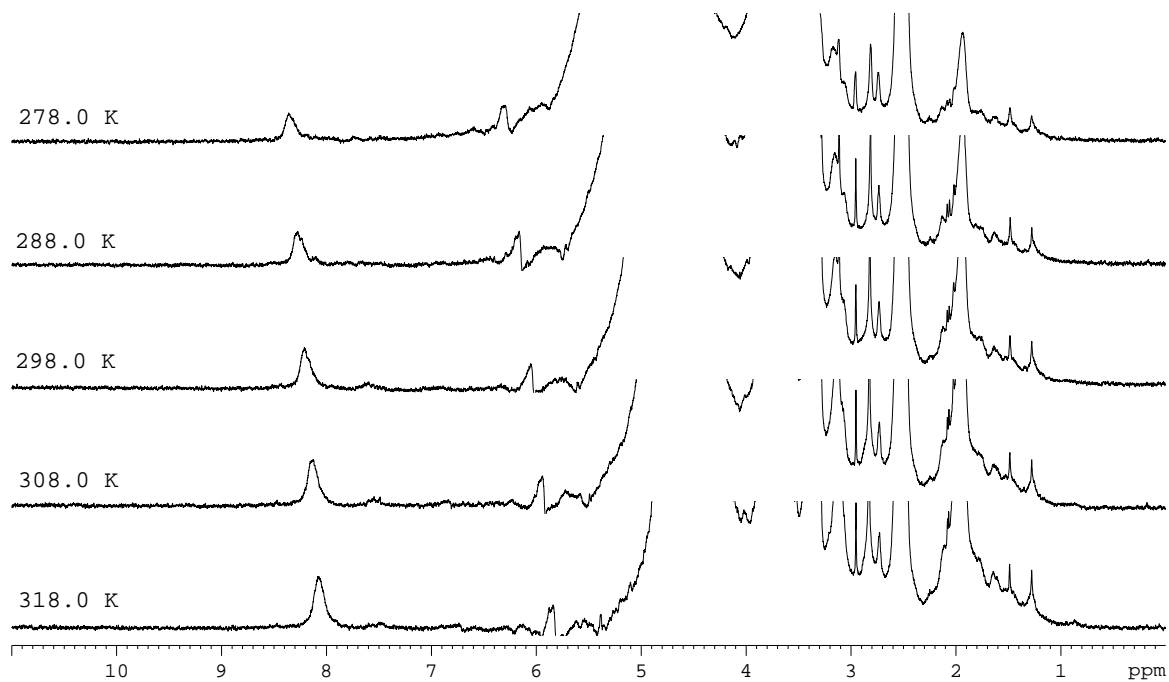

**Fig. S14.**  $^1\text{H}$  NMR spectrum (600 MHz, 10%  $\text{D}_2\text{O}$  in  $\text{H}_2\text{O}$ ) of reduced **1-mPEG-G4** (sample label before reduction: yw0380B3). Peaks at  $\delta$  8.0 – 8.5 ppm were assigned to NH groups of the amide moieties.



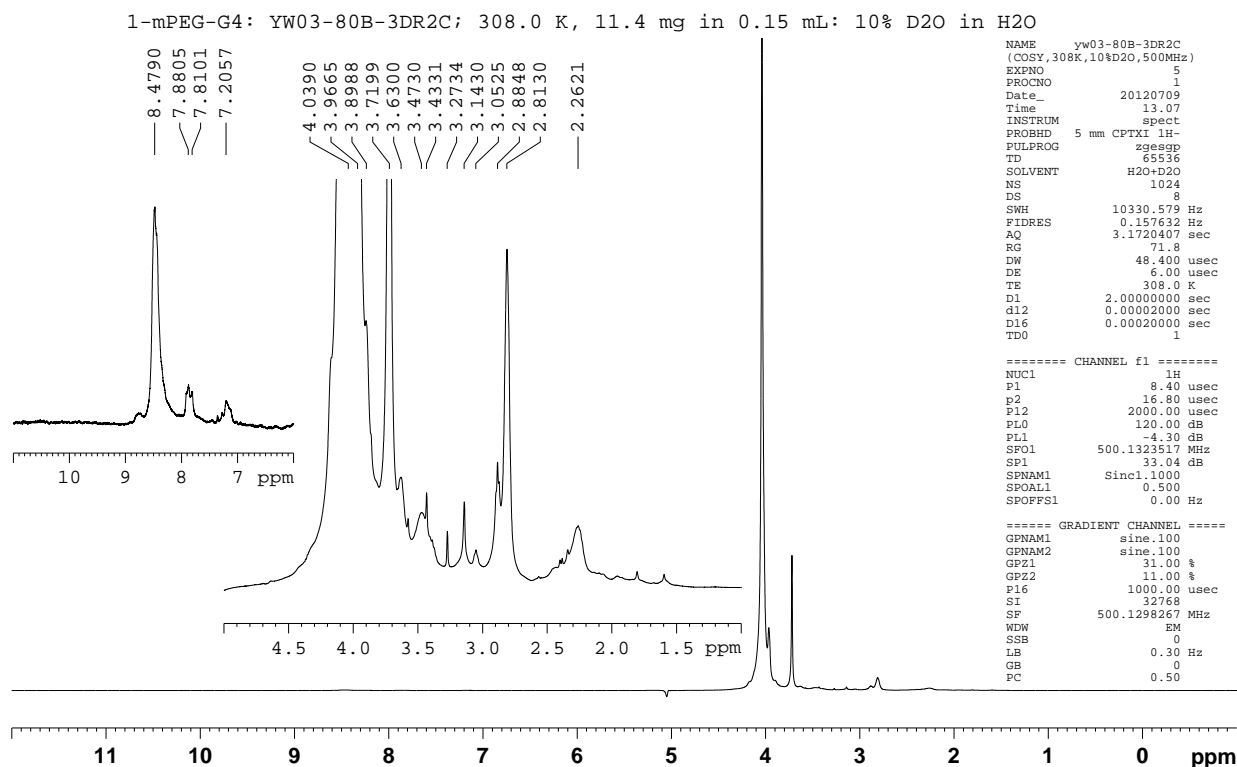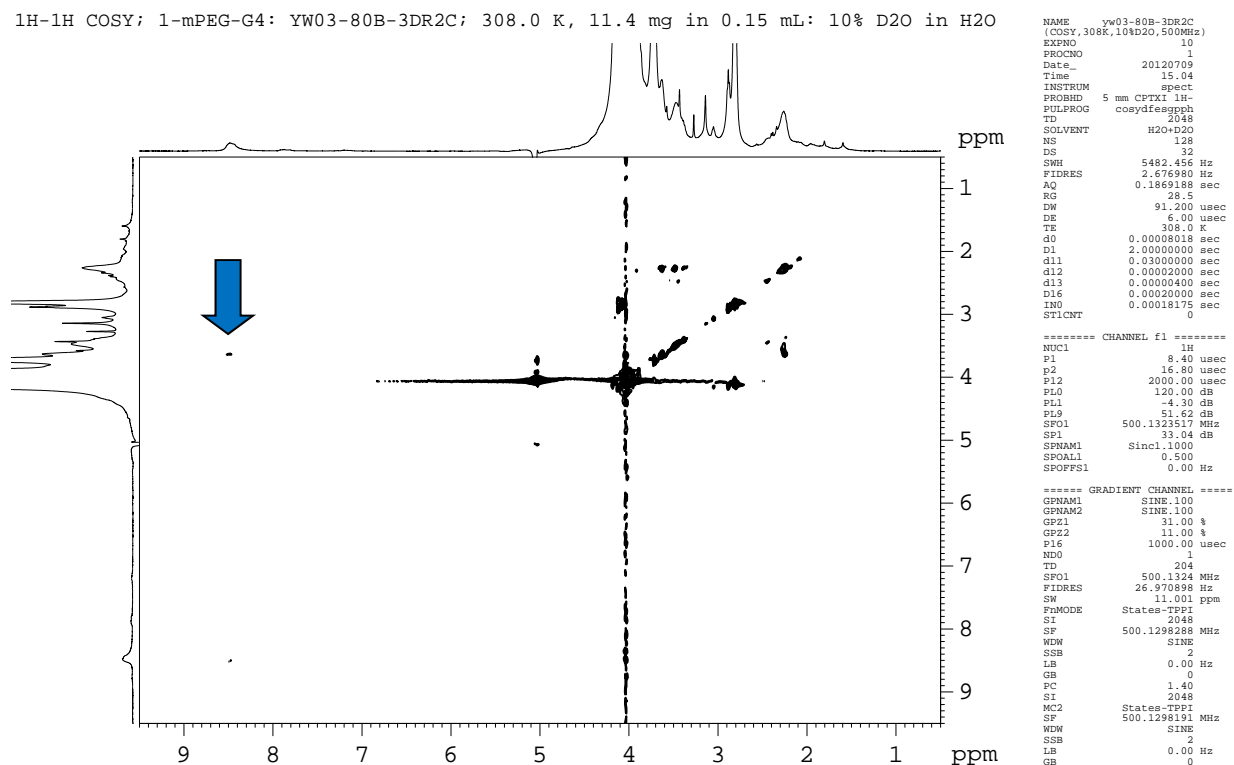

**Fig. S15.**  $^1\text{H}$  NMR (top) and  $^1\text{H}$ - $^1\text{H}$  COSY (bottom) spectra (500 MHz, 10%  $\text{D}_2\text{O}$  in  $\text{H}_2\text{O}$ ) of reduced 1-mPEG-G4 at 308 K (sample label before reduction: yw0380B3). The cross-peak between the amide NH at  $\delta$  8.5 ppm and the  $\text{NCH}_2$  of the dendrimer core at  $\delta$  3.6 ppm is labeled with a blue arrow.

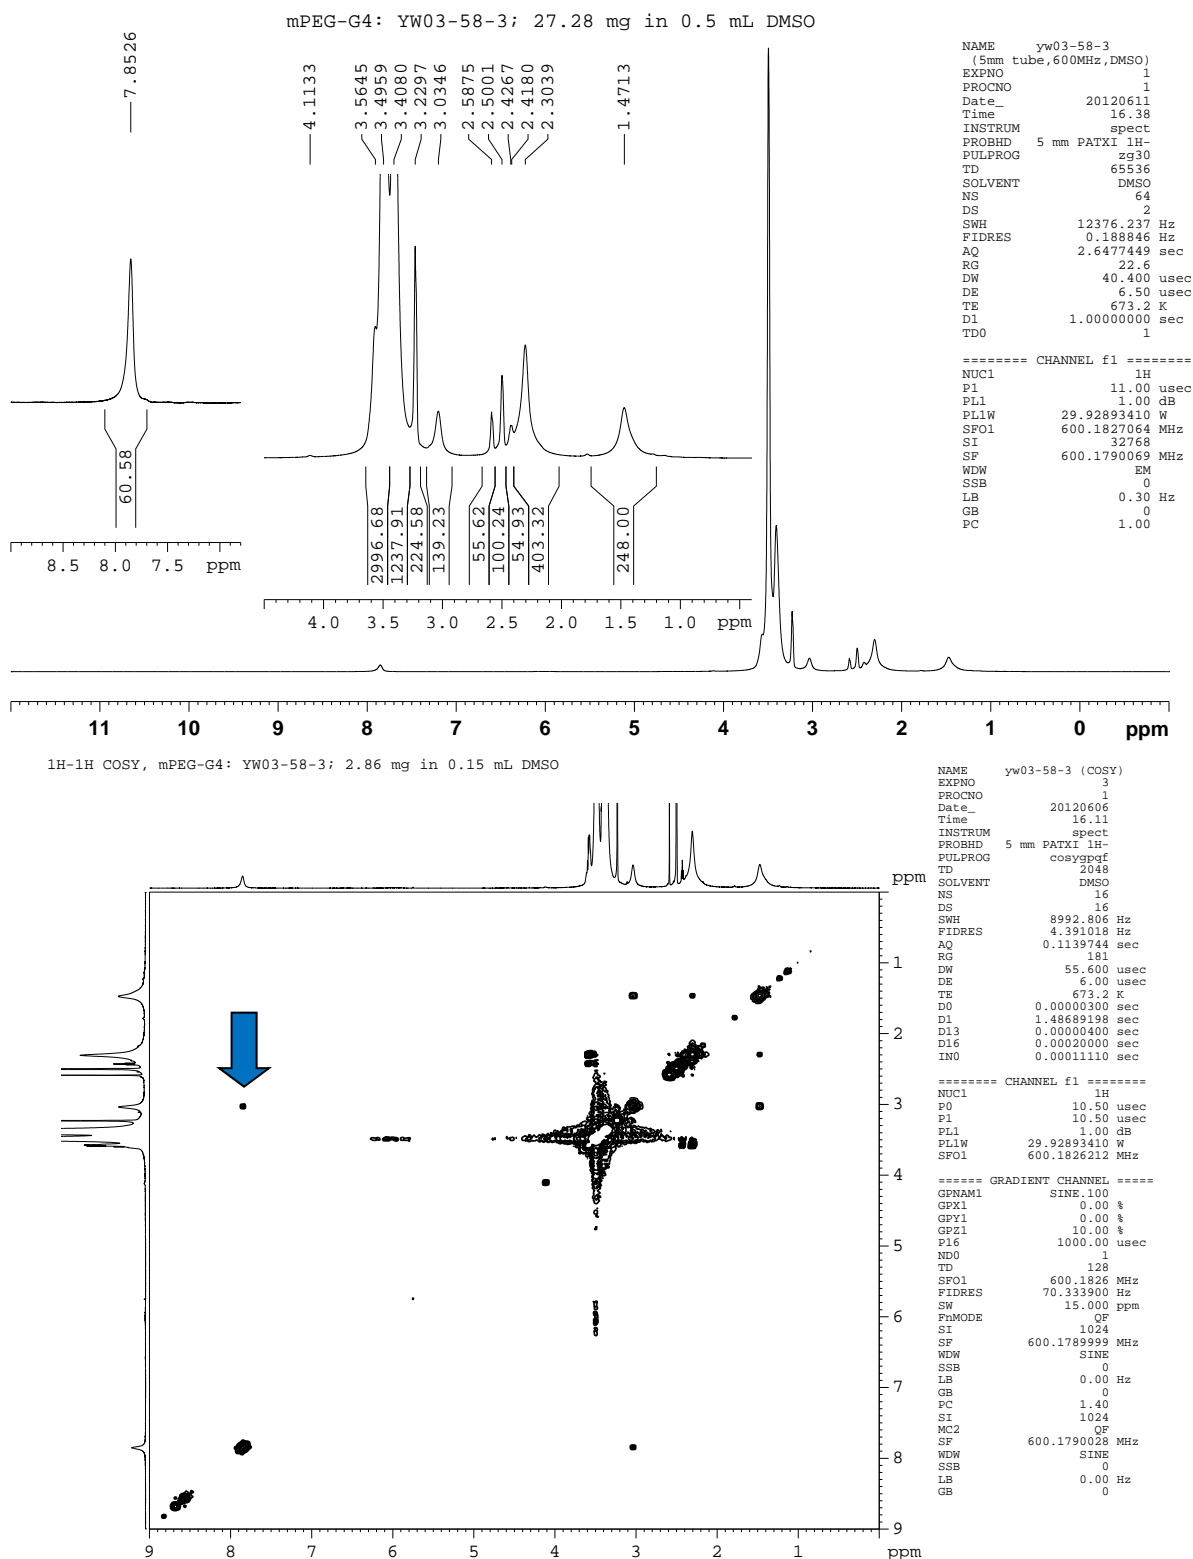

**Fig. S16.**  $^1\text{H}$  NMR (top) and  $^1\text{H}$ - $^1\text{H}$  COSY (bottom) spectra (600 MHz,  $\text{DMSO-}d_6$ ) of mPEG-G4 (sample label: yw03583). Peaks at  $\delta$  7.9 ppm and at  $\delta$  3.0 ppm, which have COSY cross-peak (see: blue arrow), were assigned to the NH groups of the amide moieties connecting mPEG-12 moieties to the dendrimer core and outermost  $\text{NCH}_2$  of the dendrimer core.

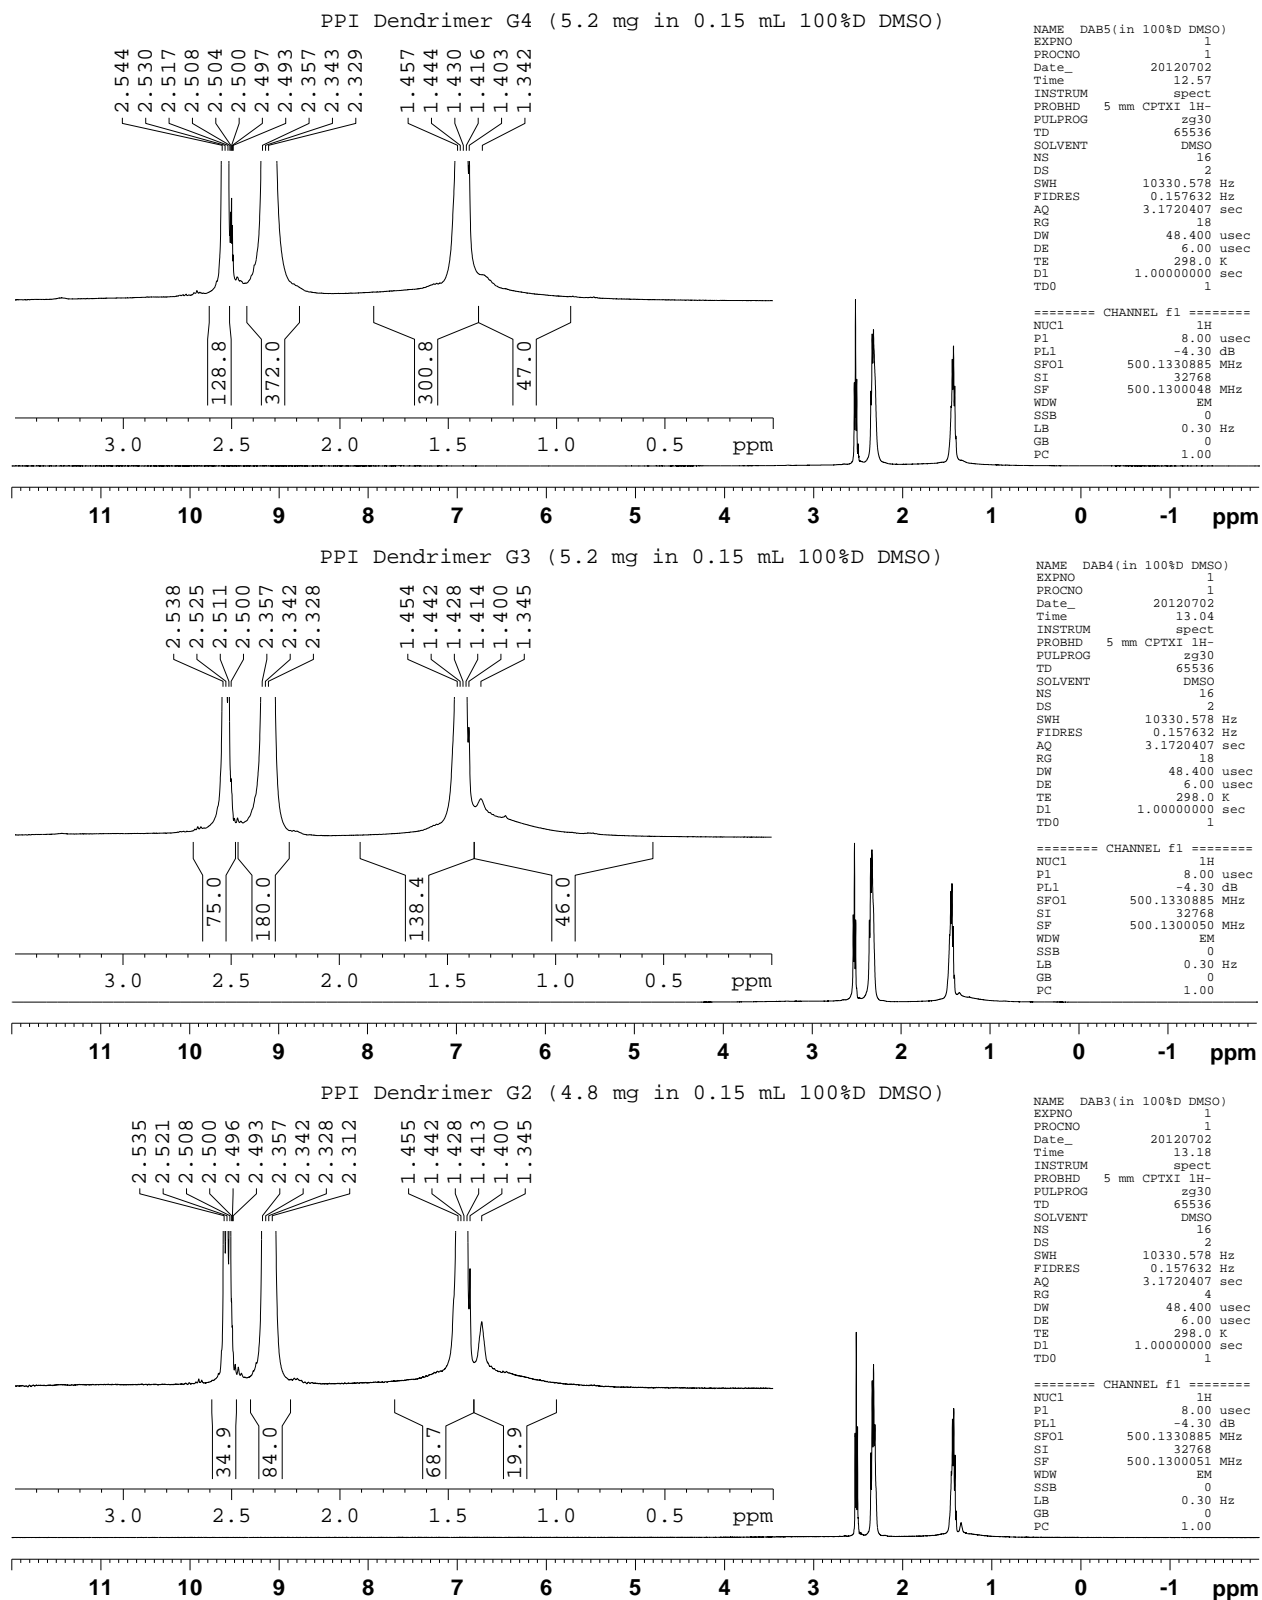

**Fig. S17.**  $^1\text{H}$  NMR spectra (500 MHz,  $\text{DMSO-}d_6$ ) of PPI dendrimers G4 (top plot), G3 (middle plot), and G2 (bottom plot). Peaks assigned to the terminal amine groups appear as broad singlet at approximately  $\delta$  1.5 ppm.

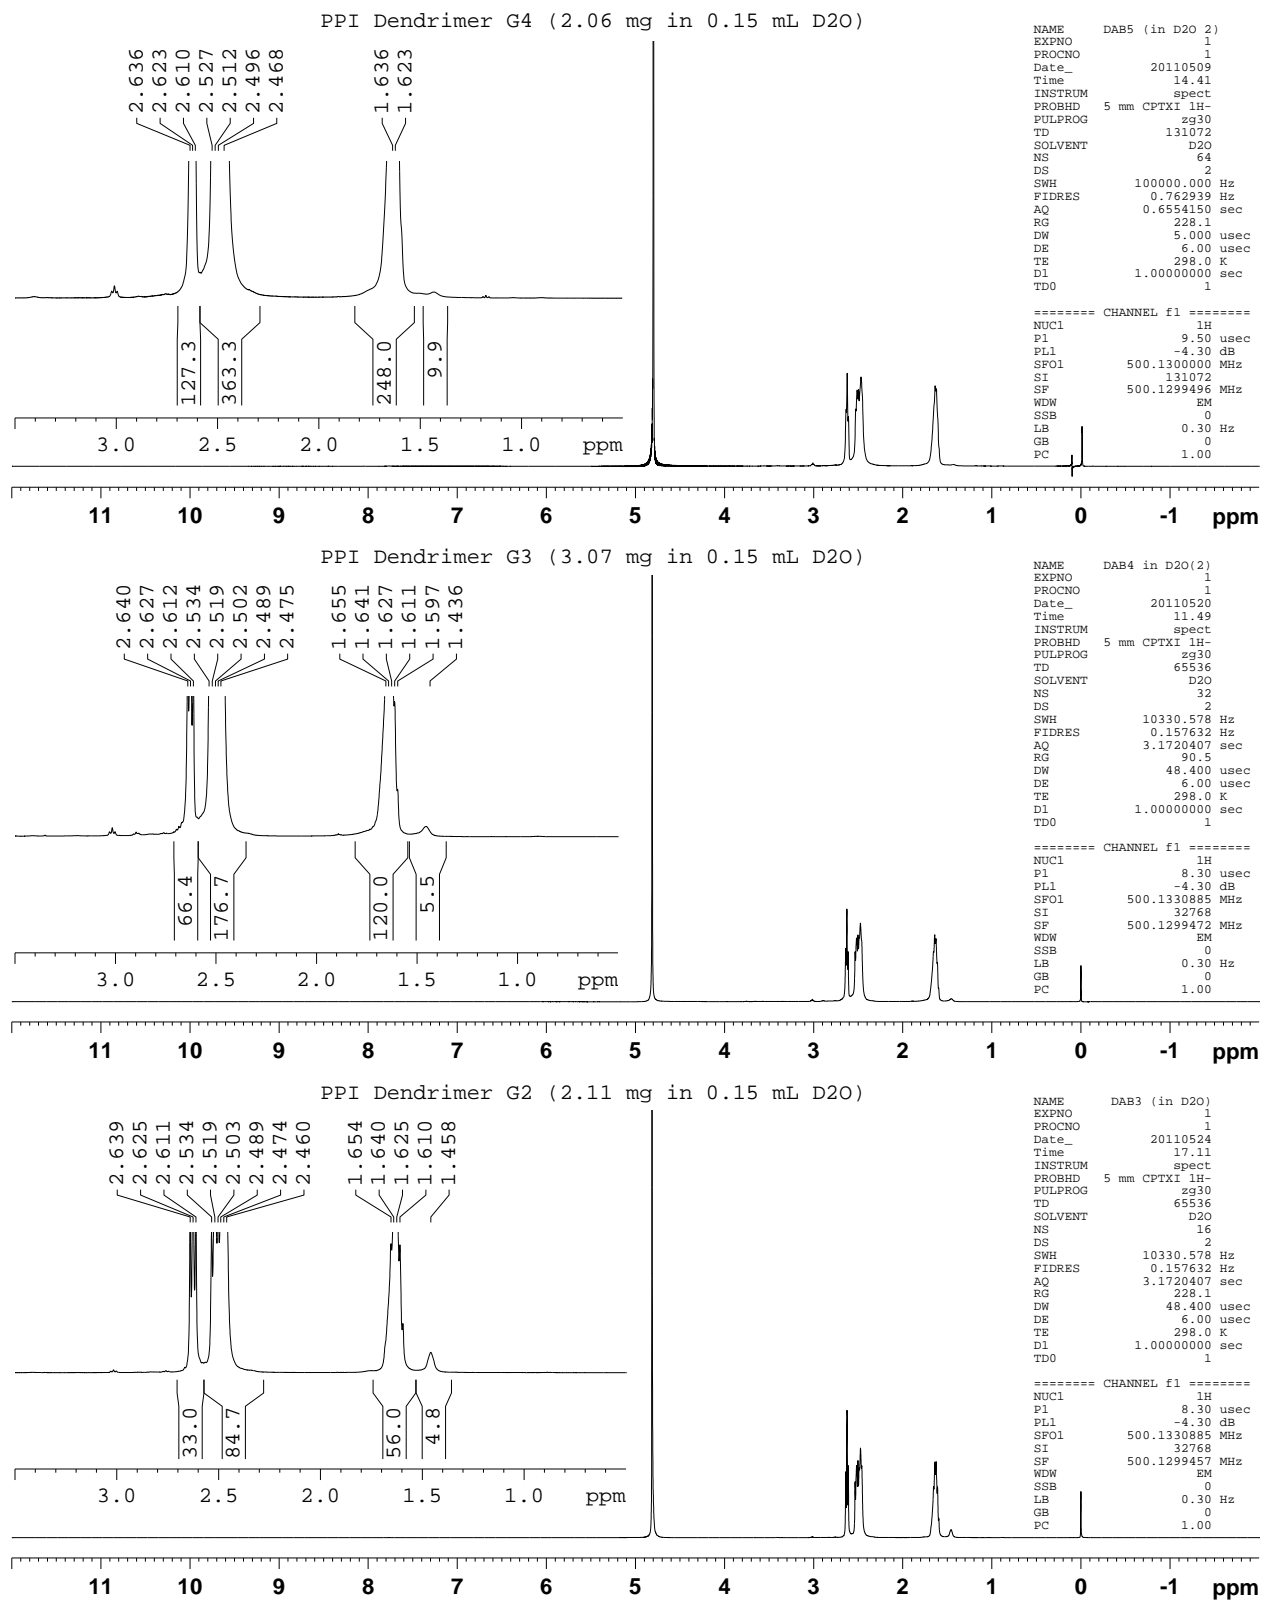

**Fig. S18.**  $^1\text{H}$  NMR spectra (500 MHz,  $\text{D}_2\text{O}$ ) of PPI dendrimers G4 (top plot), G3 (middle plot), and G2 (bottom plot).

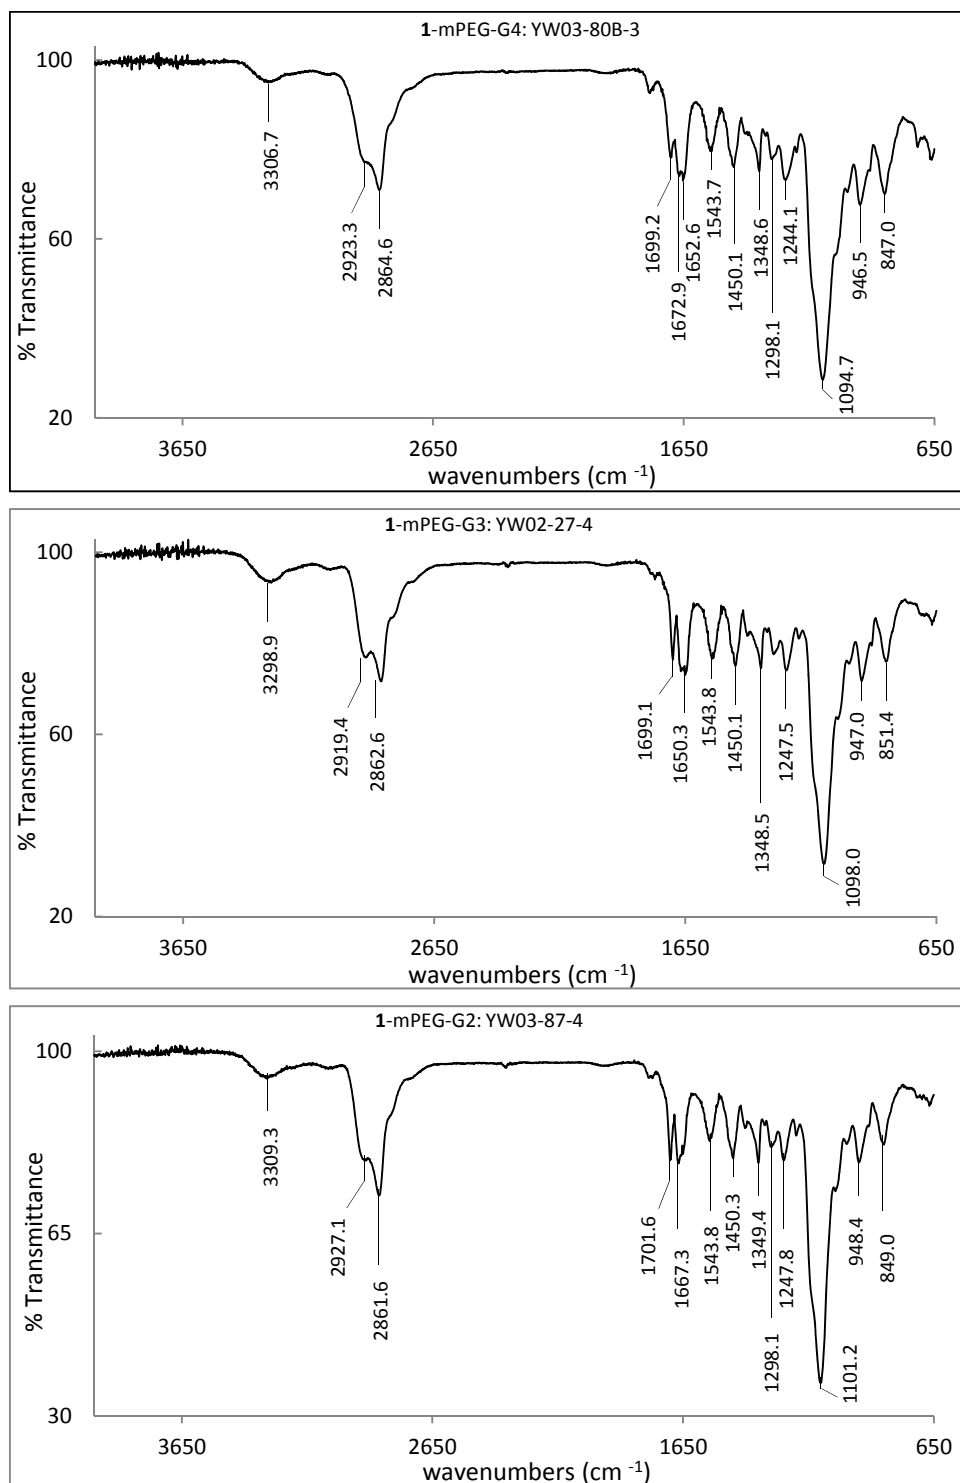

**Fig. S19.** IR (ZnSe, cm<sup>-1</sup>) spectra for 1-mPEG-G4 (top), -G3 (middle), and -G2 (bottom).

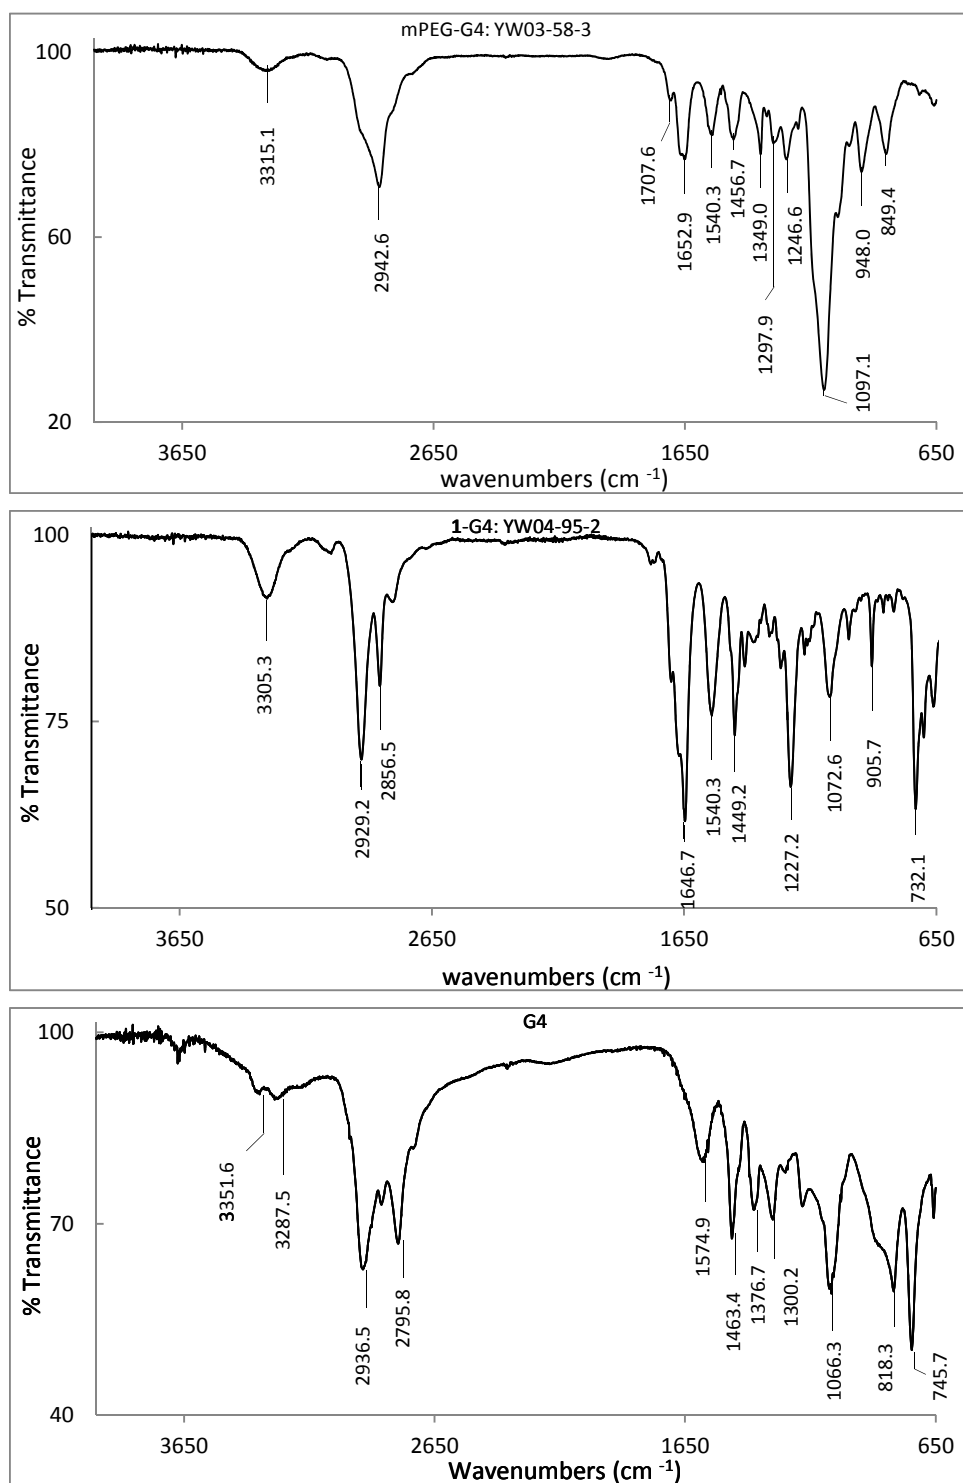

**Fig. S20.** IR (ZnSe, cm<sup>-1</sup>) spectra for mPEG-G4 (top), 1-G4 (middle), and PPI-G4 dendrimer (bottom).

### Section 3. *In Vitro* Characterization

**3.a Kinetics of reduction of nitroxides with ascorbate.** The results of kinetic measurements are summarized in Table S2 (this Section). The ascorbate solution was made with ascorbic acid, diethylenetriaminepentaacetic acid (DTPA, 0.1 mM), sodium hydroxide, and sodium phosphates (<30 ppm transition metals) at pH 7.4 (Corning pH/ion analyzer 350). Phosphate buffer was made with sodium phosphates and DTPA (0.1 mM) at pH 7.4 and used to make nitroxide solutions. Reactions were carried out with a 20 times molar excess of ascorbate<sup>4</sup>.

Nitroxide and ascorbate solutions were combined in equal portions and mixed for 6 seconds. The resultant solution was drawn into an EPR-quality quartz capillary tube (I.D. 0.5 mm), and the capillary was stoppered with parafilm and placed in an EPR sample tube in the X-band spectrometer cavity. For low molecular weight nitroxide radicals, the peak height of the low-field line of the triplet was followed over time; the spectra were integrated to improve signal-to-noise as necessary. For high molecular weight nitroxides, i.e., ORCA, the peak height of the low-field peak of the non-integrated spectrum was followed; signal-to-noise was improved by using higher concentrations (Table S2). Microwave power was kept under 6.5 mW and temperature was controlled at 295 K with nitrogen flow system.

**Table S2.** Kinetics of nitroxide reduction with ascorbate under pseudo-first order conditions in PBS buffer with pH 7.4 at 295.0 K. Kinetic data are summarized for nitroxide 3-CP, nitroxide **1**, and ORCA **1**-mPEG-G4.

| Compd             | Sample Label | Run No. | Run Label | Nitrox. Conc. (mM) | Asc. Conc. (mM) | Initial Kinetics (<1 h)             |        |                                        |                                            | Late Stage Kinetics (after 1 h)     |        |                                        |
|-------------------|--------------|---------|-----------|--------------------|-----------------|-------------------------------------|--------|----------------------------------------|--------------------------------------------|-------------------------------------|--------|----------------------------------------|
|                   |              |         |           |                    |                 | $k' \times 10^4$ (s <sup>-1</sup> ) | $R^2$  | $k$ (M <sup>-1</sup> s <sup>-1</sup> ) | Avg $k$ (M <sup>-1</sup> s <sup>-1</sup> ) | $k' \times 10^4$ (s <sup>-1</sup> ) | $R^2$  | $k$ (M <sup>-1</sup> s <sup>-1</sup> ) |
| 3-CP              | -            | 1       | JP460     | 0.20               | 4.00            | 2.547                               | 0.9996 | 0.06368                                | 0.063 ± 0.002                              |                                     |        |                                        |
| 3-CP              | -            | 2       | JP461     | 0.20               | 4.00            | 2.498                               | 0.9975 | 0.06246                                |                                            |                                     |        |                                        |
| 3-CP              | -            | 3       | JP462     | 0.20               | 4.00            | 2.459                               | 0.9999 | 0.06147                                |                                            | 1.18                                | 0.9952 | 0.030                                  |
| <b>1</b>          | jtp0408f1    | 1       | JP480     | 0.20               | 4.00            | 1.262                               | 0.9976 | 0.03155                                | 0.031 ± 0.003                              |                                     |        |                                        |
| <b>1</b>          | jtp0408f1    | 2       | JP481     | 0.20               | 4.00            | 1.142                               | 0.9959 | 0.02854                                |                                            | 0.708                               | 0.9962 | 0.018                                  |
| <b>1</b>          | jtp0408f1    | 3       | JP482     | 0.20               | 4.00            | 1.259                               | 0.9991 | 0.03147                                |                                            |                                     |        |                                        |
| <b>1</b> -mPEG-G4 | yw0380B3     | 1       | JP609     | 0.50               | 10.0            | 6.196                               | 0.9810 | 0.06196                                | 0.058 ± 0.004                              | 0.29                                | 0.9874 | 0.0029                                 |
| <b>1</b> -mPEG-G4 | yw0380B3     | 2       | JP610     | 0.50               | 10.0            | 5.420                               | 0.9766 | 0.05420                                |                                            |                                     |        |                                        |
| <b>1</b> -mPEG-G4 | yw0380B3     | 3       | JP611     | 0.50               | 10.0            | 5.725                               | 0.9985 | 0.05725                                |                                            |                                     |        |                                        |

**3.b Relaxivity ( $r_1$ ) and stability of ORCA.** The results of relaxivity ( $r_1$ ) measurements are summarized in Table S1 (Section 2).

**Relaxivity of ORCA.** Prior to relaxivity measurements, stock solutions of 3-CP, **1**-mPEG-G4, **1**-mPEG-G3, **1**-mPEG-G2, **1**-mPEG-G0, and 3-CP-mPEG-G4 in PBS pH 7.2 were examined by EPR spectroscopy to determine spin concentrations. Then, each stock solution was serially diluted with PBS pH 7.2 to provide 0.1-mL samples in 0.2-mL polypropylene centrifuge tubes, which were placed in a phantom holder. MRI data were obtained using a 7 Tesla/16 cm scanner (Bruker Pharmascan) at room temperature.

**Stability of ORCA.** A stock solution of **1**-mPEG-G4 (sample label: yw0509A4, spin conc. = 0.41 mmol/g) in PBS, pH 7.2 was determined to have spin concentration of 8.4 mM by EPR spectroscopy (EPR label: AO-8-25). Serial dilution of the stock solution was followed by phantom relaxivity study, which showed no significant decrease of  $r_1$  over 29 h at room temperature (Fig. S21).

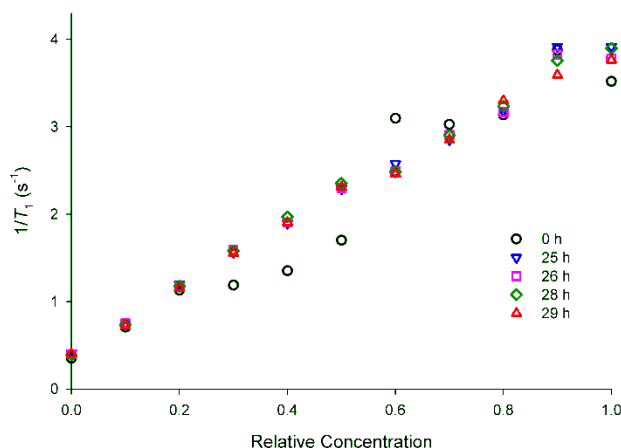

**Fig. S21.** Plots of water  $^1\text{H}$  relaxation rates,  $1/T_1$ , vs. relative concentration of nitroxide radicals in **1-mPEG-G4** in PBS pH 7.2 after indicated period of time at room temperature. Concentration range, determined by EPR spin concentration, 0 – 8.4 mM; magnetic field strength of 7 Tesla.

A sample **1-mPEG-G4** (sample label: yw0380B3) in PBS (6.7 mM, pH 7.4), recovered after *in vivo* experiments, was determined to possess a spin concentration of 99 mM by EPR spectroscopy (reference: 3-CP)(EPR label: jtp-4-07). After storing the sample for 5 months in a  $-20\text{ }^\circ\text{C}$  freezer, the spin concentration was 106 mM, i.e., unchanged within experimental error (EPR label: yw0689).

### 3.c Rotational correlation times ( $\tau_{\text{rot}}$ ), electron spin relaxation times ( $T_{1e}$ and $T_{2e}$ ), and factors limiting $R_1$ .

**Rotational correlation times.** Spin-labeled dendrimers were suspended in PBS buffer (pH 7.4) and reduced using a 3:1 molar ratio of ascorbic acid to spin label. Reduction was needed to decrease the local nitroxyl concentration which causes significant exchange broadening of the CW EPR lineshape. Spin label concentration was determined by comparison of CW EPR integrals with a nitroxyl standard. Samples were reduced until the spin labeled concentration was approximately 100  $\mu\text{M}$  before spectra were recorded for simulation. Room temperature CW EPR spectra were recorded on a Bruker EMX spectrometer at 9.8 GHz (X-band) using 2 mW microwave power, 1 G modulation amplitude at 100 kHz, 1.28 ms time constant and 40.96 ms conversion time. Between 5 and 25, 100 G scans were averaged depending on the concentration and extent of reduction of each sample. Tumbling correlation times ( $\tau_{\text{rot}}$ ) of the spin-labeled dendrimers were calculated by simulation of the CW EPR lineshapes using the *chili* toolbox of EasySpin<sup>5</sup>. Linewidths of the center lines were manually adjusted and then held constant as the  $\tau_{\text{rot}}$  was varied to give the best fit to the low-field and high-field lines. The results of rotational correlation times ( $\tau_{\text{rot}}$ ) measurements are summarized in Table S1 (Section 2) and Figs. S23 and S24 in this Section.

**Electron spin relaxation times ( $T_{1e}$  and  $T_{2e}$ ).** In the tumbling ranges for these ORCA  $T_{1e}$  is expected to be substantially longer than  $T_{2e}$ , but that difference may be decreased by the electron-electron spin exchange. The lineshapes for the EPR spectra of the spin-labeled dendrimers are not simple Lorentzians, which is attributed to a distribution of environments for the labels and unresolved hyperfine splittings. When the lineshapes for **1-mPEG-Gn** ( $n = 4, 3, 2$ ) were approximated as Lorentzians, the linewidths ranged from 3.5 to 4 G, which corresponds to



$T_{2e}$  of 19 and 16 ns. The constraint  $T_{1e} > T_{2e}$  then requires that  $T_{1e}$  for these ORCA is longer than about 20 ns.

**Factors limiting  $r_1$ .** Analyses using equations S1–S4 (Fig. S22A), which are adopted as standard in the analysis of Gd-chelates, suggest that per-nitroxide  $r_1$  may be increased to values significantly greater than  $0.4 \text{ mM}^{-1}\text{s}^{-1}$ . Similar to the gadolinium chelates, nitroxide radicals form complexes with at least one water molecule<sup>6</sup>. According to eq. S1, longitudinal  $^1\text{H}$  water relaxivity ( $r_1$ ), i.e., per-nitroxide  $r_1$ , is the sum of inner-sphere and outer-sphere contributions. The inner-sphere contribution is dominant, and thus by far the most important for optimization<sup>7</sup>. For nitroxide radicals, the primary inner sphere relaxation mechanism is the dipolar relaxation<sup>7,8</sup>. The same relaxation mechanism is expected in ORCAs, which may be considered as ensembles of weakly coupled, independent  $S = 1/2$  radicals, analogous to  $S = 7/2$  gadolinium chelates attached to dendrimers. The dipolar inner sphere relaxivity ( $r_{1\text{inner}}$ ) of water (55.55 M) per  $S = 1/2$  nitroxide is governed by standard equations S2, S3, and S4 (Fig. S22A)<sup>7,9</sup>.

Equations S2-S4 may be used to obtain plots of  $r_{1\text{inner}}$  vs.  $\tau_{\text{exch}}$  for selected values of  $\tau_{\text{rot}}$  or  $T_{1e}$  (Fig. S22B and S22C). These plots of  $r_{1\text{inner}}$ , which is expected to be the dominant contributor to  $r_1$ ,<sup>7</sup> suggest that in order to account for the measured values of  $r_1 \approx 0.40 \text{ s}^{-1}\text{mM}^{-1}$  observed for 1-mPEG-G4,  $\tau_{\text{exch}}$  has to be quite long, i.e.,  $\tau_{\text{exch}} \approx 50 \text{ }\mu\text{s}$  (very slow rate  $1/\tau_{\text{exch}}$ ). Calculations of  $r_{1\text{inner}}$  also illustrate a potential, as well as limits, in optimization of  $r_1$ . For example, if water exchange rate ( $1/\tau_{\text{exch}}$ ) can be increased so  $\tau_{\text{exch}}$  is shortened to about  $1 \text{ }\mu\text{s}$ , a typical value for per-nitroxide,  $r_1 \approx 5 \text{ s}^{-1}\text{mM}^{-1}$  is possible for an ORCA with  $\tau_{\text{rot}} \approx 1.5 \text{ ns}$  and  $T_{1e} \approx 20 \text{ ns}$ .

**A**

$$\begin{aligned}
 & \text{1H water relaxivity: } r_1 = r_{1\text{inner}} + r_{1\text{outer}} \quad (S1) \\
 & r_{1\text{inner}} = (1/1000)(q/55.55)[1/(T_{\text{Dipole}} + \tau_{\text{exch}})] \quad (S2) \\
 & 1/T_{\text{Dipole}} = (2/15)S(S+1)[(\mu_0/4\pi)^2(\gamma_N^2 g^2 \mu_B^2)/r^6]\{3\tau_c/(1 + \omega_N^2 \tau_c^2)\} + [7\tau_c/(1 + \omega_S^2 \tau_c^2)] \quad (S3) \\
 & 1/\tau_c = 1/T_{1e} + 1/\tau_{\text{exch}} + 1/\tau_{\text{rot}} \quad (S4)
 \end{aligned}$$

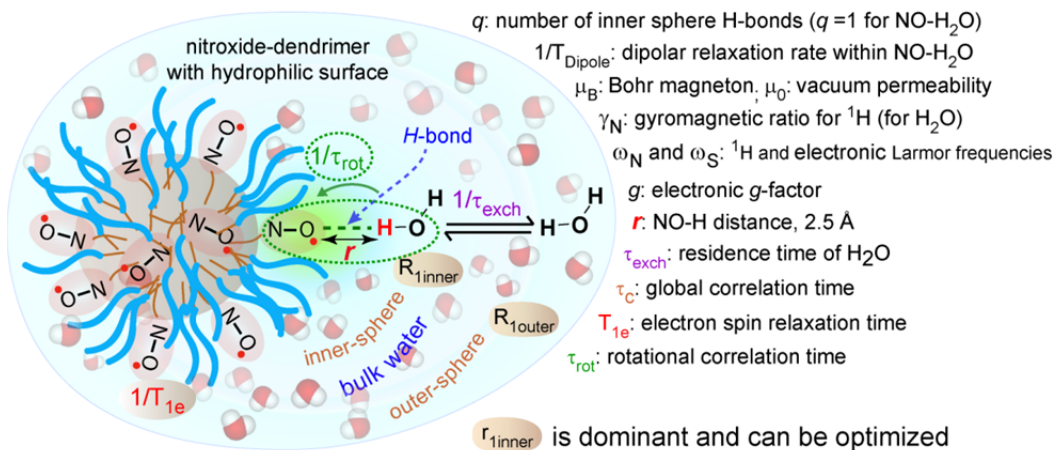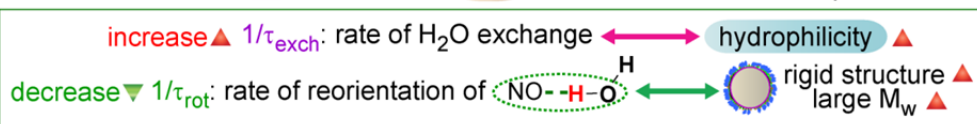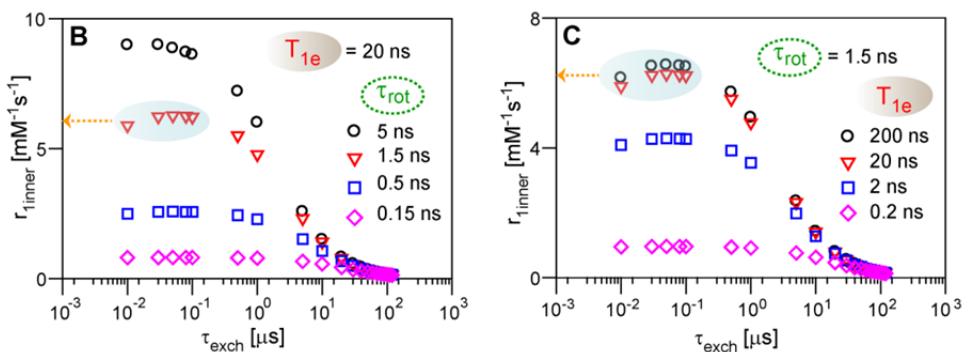

**Fig. S22.** Factors limiting  $r_1$ . (A) Dipolar inner sphere model for water <sup>1</sup>H relaxivity  $r_1$  per  $S = \frac{1}{2}$  nitroxide radical. (B) and (C) Plots of dipolar inner sphere relaxivity ( $r_{1\text{inner}}$ ) per  $S = \frac{1}{2}$  nitroxide radical versus residence time of water ( $\tau_{\text{exch}}$ ) for selected values of  $T_{1e}$  and  $\tau_{\text{rot}}$ .

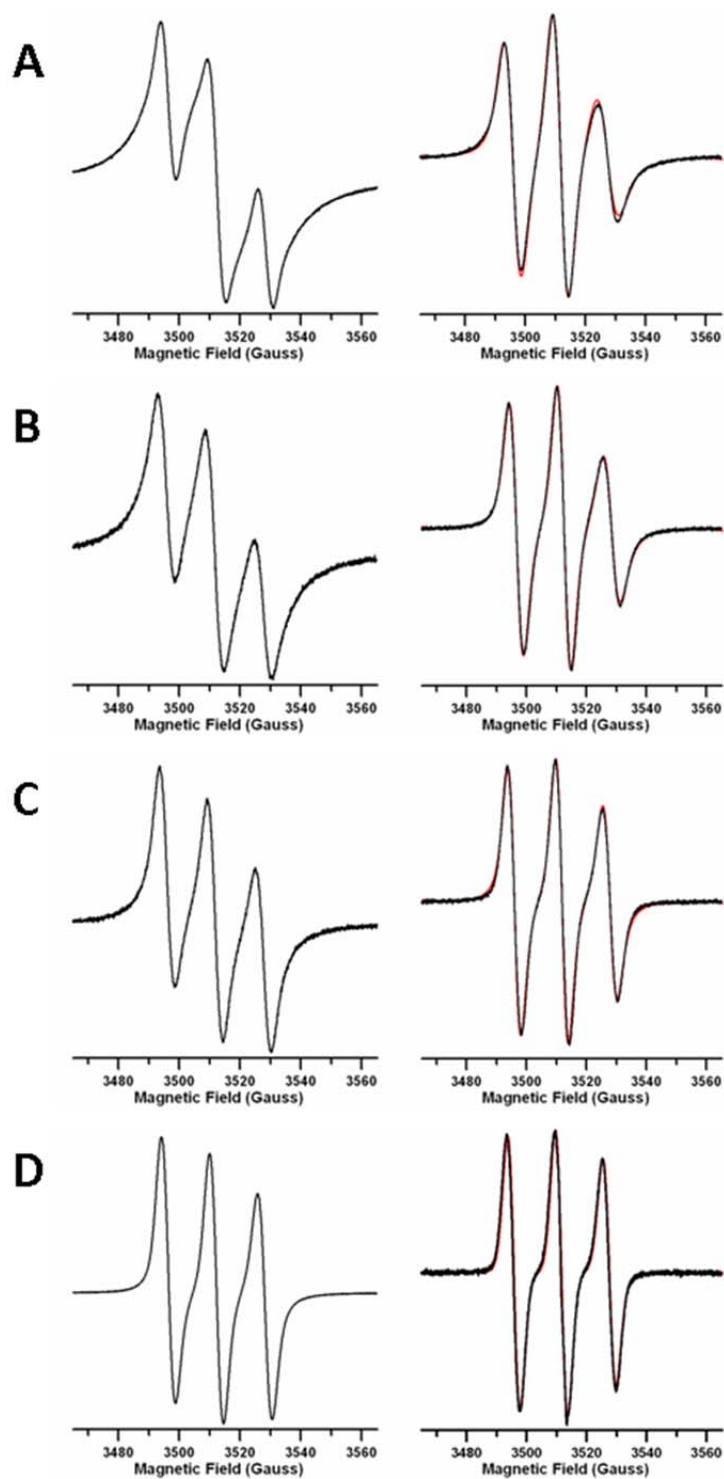

**Fig. S23.** CW EPR spectra of 1-mPEG-G4 (A), -G3 (B), -G2 (C) and -G0 (D) PPI dendrimers before (left) and after (right) reduction. For reduced spectra, data (black) and EasySpin simulations (red) are shown.

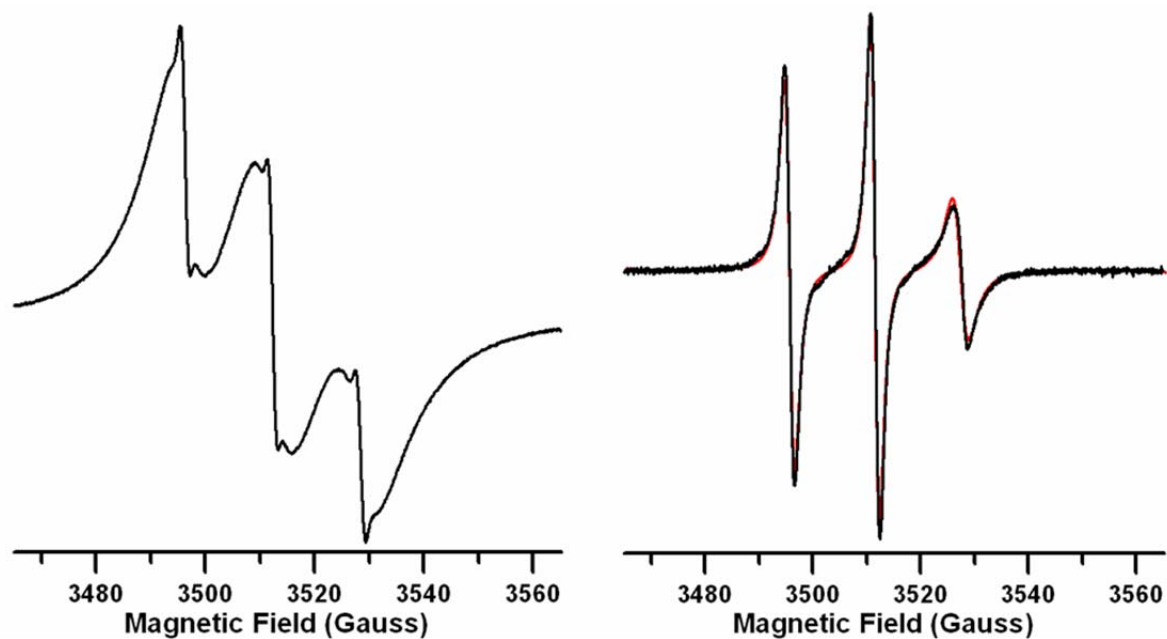

**Fig. S24.** CW EPR spectra of 3-CP-mPEG-G4 PPI dendrimers before (left) and after (right) reduction. For reduced spectrum, data (black) and EasySpin simulations (red) are shown.

#### Section 4. *In Vivo* Characterization

*ORCA 1-mPEG-G4.* Solutions of 1-mPEG-G4 were prepared in physiological PBS, to obtain 120 mM spin concentration of  $S = \frac{1}{2}$  nitroxide radicals. Volume of the injected solution was 110  $\mu\text{L}$ , corresponding to a dose of  $\sim 13 \mu\text{mol}$  of  $S = \frac{1}{2}$  nitroxide radicals per mouse. Following the injections, spin concentration of each stock solution was verified by EPR spectroscopy.

*Mice.* MRI was performed on C57 Bl6 mice in this study in accordance with protocols approved by the Institutional Animal Care and Use Committee at the University of Nebraska Medical Center (UNMC). Animals were obtained from the Jackson Laboratories (Bar Harbor, ME) and housed under specific pathogen-free conditions in accordance with the ethical guidelines for care of laboratory animals at UNMC and set forth by the National Institutes of Health.

*MRI acquisition.* Mice were anesthetized by inhalation of 1–2% isoflurane in a nitrous oxide/oxygen mixture before and during MRI data acquisition. Before MRI, a catheter was implanted into the jugular vein of mice for infusions. Then mice were placed in custom-build animal holders equipped with physiological monitoring and anesthesia delivery. Respiratory monitoring was done using an SA instruments model 1025 MRI compatible physiological monitoring system (Model 1025, SA Instruments, Stony Brook, NY). MRI data were obtained using a 7 Tesla/16 cm Bruker Pharmascan (Karlsruhe, Germany), with a 38 mm volume coil transmitter and receiver. Whole body  $T_1$  weighted images were obtained using 3D FLASH with acquisition parameters of 50 x 40 x 20 mm field-of-view (FOV), a 256 x 196 x 128 matrix, 35° flip angle, 10 ms repetition time ( $T_R$ ), 2.7 ms echo time ( $T_E$ ), and six averages for a total acquisition time of 25 m 5.28 s. Images were reconstructed to 256 x 256 x 256.

*Mouse MRI Data Analysis using ImageJ.* We measure Region of Interest (ROI) using Freehand and Rectangle Selections as shown in an example below.

|                                                                                       |                                                                                       |                                                                                     |
|---------------------------------------------------------------------------------------|---------------------------------------------------------------------------------------|-------------------------------------------------------------------------------------|
| Freehand Selection<br>("0107-0108-0094")<br>X: 84<br>Y: 93<br>Width: 21<br>Height: 30 | Rectangle Selection<br>("0107-0109-0087")<br>X: 85<br>Y: 107<br>Width: 4<br>Height: 4 | 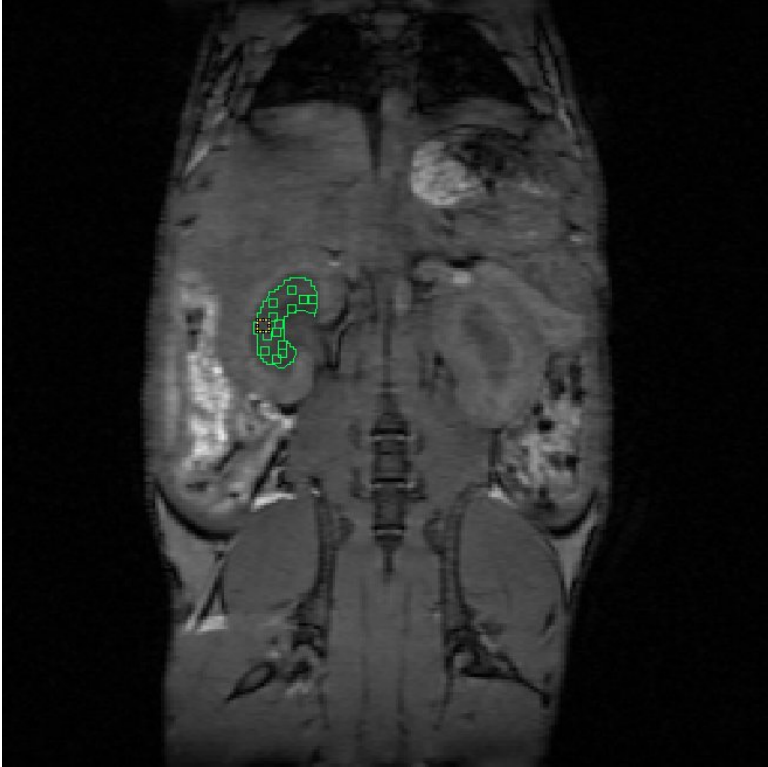 |
|---------------------------------------------------------------------------------------|---------------------------------------------------------------------------------------|-------------------------------------------------------------------------------------|

| Label                          | Area | Mean     | StdDev  | Mode | Min  | Max  | Circ  | IntDen  | RawIntDen | Slice | AR    | Round | Solidity |
|--------------------------------|------|----------|---------|------|------|------|-------|---------|-----------|-------|-------|-------|----------|
| 2dseq_4_M35:0107-0108-0094:107 | 346  | 6399.673 | 575.321 | 6770 | 4700 | 7731 | 0.519 | 2214287 | 2214287   | 107   | 2.088 | 0.479 | 0.758    |
| 2dseq_4_M35:0107-0109-0087:107 | 16   | 6988.312 | 253.759 | 6643 | 6643 | 7553 | 0.785 | 111813  | 111813    | 107   | 1     | 1.000 | 1        |

| Label                          | Area | Mean     | StdDev  | Mode     | Min      | Max      | Circ  | IntDen    | RawIntDen | Slice | AR | Round | Solidity |
|--------------------------------|------|----------|---------|----------|----------|----------|-------|-----------|-----------|-------|----|-------|----------|
| 2dseq_4_M35:0107-0101-0090:107 | 9    | 6468.556 | 264.464 | 5981     | 5981     | 6857     | 0.785 | 58217     | 58217     | 107   | 1  | 1.000 | 1        |
| 2dseq_4_M35:0107-0097-0096:107 | 9    | 6600.556 | 160.854 | 6402     | 6402     | 6896     | 0.785 | 59405     | 59405     | 107   | 1  | 1.000 | 1        |
| 2dseq_4_M35:0107-0117-0087:107 | 9    | 6640.667 | 148.082 | 6414     | 6414     | 6869     | 0.785 | 59766     | 59766     | 107   | 1  | 1.000 | 1        |
| 2dseq_4_M35:0107-0120-0091:107 | 9    | 6398.444 | 253.029 | 5938     | 5938     | 6671     | 0.785 | 57586     | 57586     | 107   | 1  | 1.000 | 1        |
| 2dseq_4_M35:0107-0118-0093:107 | 9    | 6507.111 | 253.589 | 6130     | 6130     | 6803     | 0.785 | 58564     | 58564     | 107   | 1  | 1.000 | 1        |
| 2dseq_4_M35:0107-0108-0092:107 | 9    | 6394     | 289.544 | 5798     | 5798     | 6714     | 0.785 | 57546     | 57546     | 107   | 1  | 1.000 | 1        |
| 2dseq_4_M35:0107-0103-0096:107 | 9    | 5251.111 | 189.447 | 5027     | 5027     | 5510     | 0.785 | 47260     | 47260     | 107   | 1  | 1.000 | 1        |
| 2dseq_4_M35:0107-0112-0088:107 | 9    | 6916.778 | 186.480 | 6765     | 6765     | 7245     | 0.785 | 62251     | 62251     | 107   | 1  | 1.000 | 1        |
| 2dseq_4_M35:0107-0115-0093:107 | 9    | 5592.778 | 177.281 | 5371     | 5371     | 5860     | 0.785 | 50335     | 50335     | 107   | 1  | 1.000 | 1        |
| 2dseq_4_M35:0107-0106-0090:107 | 9    | 6538.889 | 185.376 | 6305     | 6305     | 6815     | 0.785 | 58850     | 58850     | 107   | 1  | 1.000 | 1        |
| 2dseq_4_M35:0107-0100-0103:107 | 9    | 5974.556 | 287.192 | 5673     | 5673     | 6557     | 0.785 | 53771     | 53771     | 107   | 1  | 1.000 | 1        |
| 2dseq_4_M35:0107-0100-0100:107 | 9    | 5810.889 | 284.878 | 5554     | 5554     | 6266     | 0.785 | 52298     | 52298     | 107   | 1  | 1.000 | 1        |
| 2dseq_4_M35:0107-0111-0091:107 | 9    | 6463.778 | 286.124 | 6121     | 6121     | 7113     | 0.785 | 58174     | 58174     | 107   | 1  | 1.000 | 1        |
| Summary:                       |      |          |         |          |          |          |       |           |           |       |    |       |          |
| Mean                           | 9    | 6273.701 | 228.180 | 5959.923 | 5959.923 | 6628.923 | 0.785 | 56463.308 | 56463.308 | 1     | 1  | 1     |          |
| SD                             | 0    | 474.079  | 54.014  | 475.669  | 475.669  | 487.247  | 0     | 4266.711  | 4266.711  | 0     | 0  | 0     |          |
| Min                            | 9    | 5251.111 | 148.082 | 5027     | 5027     | 5510     | 0.785 | 47260     | 47260     | 1     | 1  | 1     |          |
| Max                            | 9    | 6916.778 | 289.544 | 6765     | 6765     | 7245     | 0.785 | 62251     | 62251     | 1     | 1  | 1     |          |

The average mean value (highlighted in blue), obtained from several areas with value of 9, for time 0 (pre-injection), 30 min, 60 min and 90 min, of raw data are tabulated for selected organs (Blood, Kidney-Medulla, Kidney-Cortex, Liver, Muscle Tissue, and Bladder) for each mouse. We normalize the mean values of a selected organ to that of Muscle Tissue which remain nearly constant over the time of the experiment. The mean and standard error of normalized data for 3 mice are plotted in the Figure 4 (main text).

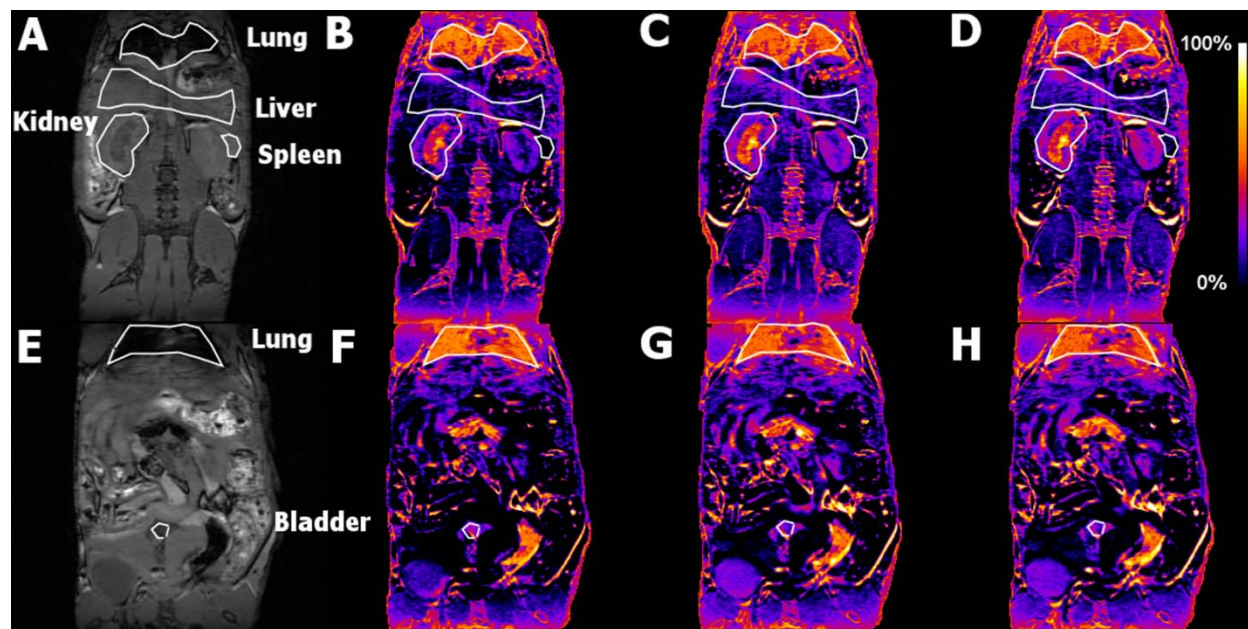

**Fig. S25.** Enlarged Figure 3 (main text). 3D T<sub>1</sub> weighted spoiled gradient recalled echo MRI of mouse before and after injection of 1-mPEG-G4. (A,E) MRI before injection and (B–D,F–H): subtraction of pre-injection images from images obtained (B,D) 0–30 min, (C,E) 30–60 min, and (D,H) 60–90 min after injection.

## Section 5. Supporting References

1. Ma, Z.; Huang, Q.; Bobbitt, J. M. Oxoammonium salts. 5. A new synthesis of hindered piperidines leading to unsymmetrical TEMPO-type nitroxides. Synthesis and enantioselective oxidations with chiral nitroxides and chiral oxoammonium salts. *J. Org. Chem.* **1993**, *58*, 4837–4843.
2. Rajca, A.; Kathirvelu, V.; Roy, S. K.; Pink, M.; Rajca, S.; Sarkar, S.; Eaton, S. S.; Eaton, G. R. A spirocyclohexyl nitroxide amino acid spin label for pulsed EPR spectroscopy distance measurements. *Chem. Eur. J.* **2010**, *16*, 5778–5782.
3. Sosnovsky, G.; Cai, Z. A Study of the Favorskii rearrangement with 3-bromo-4-oxo-2,2,6,6-tetramethylpiperidine-1-oxyl. *J. Org. Chem.* **1995**, *60*, 3414–3418.

4. Vianello, F.; Momo, F.; Scarpa, M.; Rigo, A. Kinetics of nitroxide spin label removal in biological systems: An in vitro and in vivo ESR study. *Magn. Reson. Imaging* **1995**, *13*, 219–226.
5. Stoll, S.; Schweiger, A. EasySpin, a comprehensive software package for spectral simulation and analysis in EPR. *J. Magn. Reson.* **2006**, *178*, 42–55.
6. Franchi, P.; Lucarini, M.; Pedrielli, P.; Pedulli, G. F. Nitroxide radicals as hydrogen bonding acceptors. An infrared and ESR study. *ChemPhysChem* **2002**, *3*, 789–793.
7. Maliakal, A. J.; Turro, N. J.; Bosman, A. W.; Cornel, J.; Meijer, E. W. Relaxivity studies on dinitroxide and polynitroxyl functionalized dendrimers: effect of electron exchange and structure on paramagnetic relaxation enhancement. *J. Phys. Chem. A* **2003**, *107*, 8467–8475.
8. Borah, B.; Bryant, R. NMR relaxation dispersion in an aqueous nitroxide system. *J. Chem. Phys.* **1981**, *75*, 3297–3300.
9. Nicolle, G. M.; Toth, E.; Schmitt-Willich, H.; Raduchel, B.; Merbach, A. E. The impact of rigidity and water exchange on the relaxivity of a dendritic MRI contrast agent. *Chem. Eur. J.* **2002**, *8*, 1040–1048.
